# Supplementary material
Source: PubMed Central journal article supplement (PMC9898181)
Supplement: NIHMS1861661-supplement-GOTERM_Biological_Pathway_table.pdf [file NIHMS1861661-supplement-GOTERM_Biological_Pathway_table.pdf]

| Category             | Term                              | Count | P Value  | Genes                                                                                                                                                                                                                                                                                                                                                                                                                   |
|----------------------|-----------------------------------|-------|----------|-------------------------------------------------------------------------------------------------------------------------------------------------------------------------------------------------------------------------------------------------------------------------------------------------------------------------------------------------------------------------------------------------------------------------|
| GOTERM_BP_DIR<br>ECT | GO:0002376~immune system process  | 58    | 3.76E-22 | MASP1, S100A8, LY86, S100A9, TLR2, HP, C1QC, TLR7, CFP, OASL1, CLEC4A2, LBP, MX1, CD300C2, PIK3CG, ADGRE1, SERPING1, CLEC4N, CD84, C1QA, C1QB, CD86, SERPINA3G, H2-AA, MST1R, PRDM1, CD300LB, CLEC5A, CD300LD, TNFAIP8L2, TNFRSF21, HMGB2, IFITM1, C3, FCNA, IL4RA, OAS3, IFI30, ALCAM, PTK2B, PSTPIP1, CSF1R, ZBP1, LGALS3, CFB, HCK, TLR13, CTLA4, ANXA1, H2-AB1, FCGR1, CD180, LCN2, PIRB, IFIT3, IRF7, H2-EB1, CD14 |
| GOTERM_BP_DIR<br>ECT | GO:0007155~cell adhesion          | 55    | 2.80E-15 | MYBPC2, ATP1B2, FERMT3, IGFBP7, POSTN, CDH22, WISP2, CGREF1, WISP1, CTGF, HPSE, TGFBI, CSF3R, COL12A1, CNTNAP1, CDH23, PARVG, PTPRF, PDPN, CERCAM, CD84, NCAM1, SIGLEC1, MFAP4, CYP1B1, TNC, ITGB2, ITGB3, CD24A, ITGAM, ALCAM, LPXN, COL6A6, PTK2B, COMP, ITGB6, PSTPIP1, EMB, GPNMB, COL8A1, SELPLG, THBS3, SPP1, FN1, THBS4, SVEP1, ADAM23, PCDH12, COL16A1, COL5A1, EPHA4, LYVE1, COL14A1, SRPX2, SULF1             |
| GOTERM_BP_DIR<br>ECT | GO:0045087~innate immune response | 49    | 6.03E-15 | S100A8, MASP1, LY86, S100A9, TLR2, C1QC, TLR7, CFP, ANG, OASL1, CLEC4A2, LBP, MX1, C4B, SERPING1, CLEC4N, C1QA, CD84, C1QB, PRDM1, MST1R, TREM2, CLEC5A, TNFAIP8L2, HMGB2, IFITM1, C3, FCNA, OAS3, PTK2B, PSTPIP1, FCER1G, CSF1R, ZBP1, TYROBP, LGALS3, CFB, HCK, TLR13, ANXA1, FCGR1, CD180, LCN2, IFIT3,                                                                                                              |

|                      |                                                     |    |            |                                                                                                                                                                                                                                                                                                                   |
|----------------------|-----------------------------------------------------|----|------------|-------------------------------------------------------------------------------------------------------------------------------------------------------------------------------------------------------------------------------------------------------------------------------------------------------------------|
|                      |                                                     |    |            | CYBB, TRIM59, IRF7, CLEC7A, CD14                                                                                                                                                                                                                                                                                  |
| GOTERM_BP_DIR<br>ECT | GO:0006954~inflammatory response                    | 44 | 3.97E-14   | TNFRSF21, C3AR1, HMGB2, S100A8, C3, CCR1, LY86, S100A9, CCL9, TLR2, CCL8, PF4, TLR7, CCL6, CXCL10, S1PR3, SLC11A1, CYP26B1, ITGB6, PSTPIP1, NOS2, ADAM8, CSF1R, SPP1, PIK3CG, BMP2, C5AR1, C4B, NCF1, HCK, TLR13, ANXA1, ACKR2, ECM1, CD180, CD163, CCL12, CYBB, CCR5, CCR2, PLA2G7, CLEC7A, PTAFR, CD14          |
| GOTERM_BP_DIR<br>ECT | GO:0007049~cell cycle                               | 44 | 2.36E-06   | E2F1, KIF23, PRC1, DBF4, ANLN, AURKB, CGREF1, NCAPH, CDCA8, HMCN1, NCAPG2, INCENP, FBXO5, CCNA2, ASPM, CKAP2, CDK1, KIF11, MKI67, TRNP1, IKZF1, TPX2, NUSAP1, CENPE, BIRC5, CDC20, RACGAP1, UBE2C, KNSTRN, SMC2, MCM5, SMC4, CDKN1C, UHRF1, CCNB2, MAD2L1, DUSP1, PLK1, SPAG5, RGCC, KIF20B, BUB1B, CHAF1A, SMPD3 |
| GOTERM_BP_DIR<br>ECT | GO:0043066~negative regulation of apoptotic process | 34 | 0.00101077 | IER3, MMP9, CLU, HSPA1B, TGFB2, TIMP1, GPX1, CASP3, PTK2B, COMP, ANGPT1, SCX, CSF1R, SPP1, ANGPTL4, FN1, BMP4, CDK1, LGALS3, HCK, NCKAP1L, BIRC5, PLAC8, KDR, PLAUR, IFIT3, MAD2L1, SFRP1, DUSP1, BCL2A1B, BTG2, UCP2, PLK1, CLEC5A                                                                               |
| GOTERM_BP_DIR<br>ECT | GO:0051301~cell division                            | 32 | 2.19E-06   | KIF23, KIFC1, PRC1, ANLN, AURKB, CDCA8, NCAPH, HMCN1, NCAPG2, INCENP, FBXO5, CCNA2, ASPM, CDK1, KIF11, TPX2, NUSAP1, CENPE, CDC20, BIRC5, KNSTRN, UBE2C, RACGAP1, SMC2, MCM5, SMC4, MAD2L1, CCNB2, PLK1, SPAG5, KIF20B, BUB1B                                                                                     |

|                      |                                                      |    |                |                                                                                                                                                                                                                    |
|----------------------|------------------------------------------------------|----|----------------|--------------------------------------------------------------------------------------------------------------------------------------------------------------------------------------------------------------------|
| GOTERM_BP_DIR<br>ECT | GO:0010628~positive regulation of gene expression    | 32 | 8.24E-06       | E2F1, HMGB2, LDLR, STAR, TNC, VIM, IQGAP3, TLR2, PF4, ITGB3, TGFB2, ALDH1A2, SLC11A1, CTGF, CD46, CYP26B1, SERPINE1, NFIL3, SCX, FN1, EGR1, BMP4, CDK1, BMP2, IKZF1, RNF207, PLAUR, LCN2, INHBA, CCR5, RGCC, PRDM1 |
| GOTERM_BP_DIR<br>ECT | GO:0008284~positive regulation of cell proliferation | 32 | 0.001913<br>16 | PRC1, TNC, CRLF1, CLU, CXCL10, TGFB2, TIMP1, ALDH1A2, RAC2, FOLR2, PTK2B, CTGF, PTN, PDGFC, PAK1, SCX, MYC, CSF1R, FN1, BMP4, PTPN6, LGALS3, NTF3, HCK, CDC20, S100A13, PLAC8, KDR, PLA2G4A, SFRP1, KIF20B, HBEGF  |
| GOTERM_BP_DIR<br>ECT | GO:0006508~proteolysis                               | 30 | 0.016557<br>23 | AEBP1, MASP1, CNDP2, LGMN, MMP9, UCHL1, PAMR1, HP, ENPEP, MMP3, PCOLCE, ACE, CASP3, CD46, ADAMTS12, ADAM8, DPEP2, CTSZ, ADAM23, CFB, MMP19, ESPL1, KY, CTSS, MMP12, CTSK, ADAM1A, CTSC, CTSB, ADAMTS2              |
| GOTERM_BP_DIR<br>ECT | GO:0007067~mitotic nuclear division                  | 29 | 1.29E-07       | KIF23, ANLN, AURKB, CDCA8, NCAPH, NCAPG2, INCENP, FBXO5, CCNA2, ASPM, TUBB3, CDK1, KIF11, TPX2, NUSAP1, CDC20, ESPL1, BIRC5, CENPE, KNSTRN, UBE2C, SMC2, SMC4, MAD2L1, CCNB2, PLK1, SPAG5, KIF20B, BUB1B           |
| GOTERM_BP_DIR<br>ECT | GO:0006955~immune response                           | 27 | 1.06E-06       | CCR1, CCL9, OAS3, TLR2, CCL8, PF4, TLR7, CD24A, CCL6, CXCL10, HRH2, OASL1, NFIL3, PRG4, CTLA4, COLEC12, H2-AB1, CTSS, VAV1, WAS, CCL12, CCR5, FCGR2B, CCR2, H2-EB1, H2-AA, LCP2                                    |
| GOTERM_BP_DIR<br>ECT | GO:0043065~positive regulation of apoptotic process  | 27 | 4.43E-05       | TSPO, CYP1B1, MMP9, CLU, OSGIN1, ANKRD1, TGFB2, ALDH1A2, ACE, CASP3, HMOX1, TGM2, PTN, TOP2A, BMP4, NOX4, BMP2, PTPRF, NTF3,                                                                                       |

|                     |                                                      |    |           |                                                                                                                                                                                       |
|---------------------|------------------------------------------------------|----|-----------|---------------------------------------------------------------------------------------------------------------------------------------------------------------------------------------|
|                     |                                                      |    |           | CTLA4, ANXA1, FRZB, PLA2G4A, NUPR1, SFRP1, DUSP1, BCL2A1B                                                                                                                             |
| GOTERM_BP_DIRECTORY | GO:0001525~angiogenesis                              | 26 | 3.18E-07  | RTN4, CYP1B1, ENPEP, CTGF, PTK2B, ANG, HMOX1, TGFB1, SERPINE1, ANGPT1, COL8A1, ADAM8, FN1, ANGPTL4, PIK3CG, BMP4, MMP19, CCDC80, ECM1, ANXA2, KDR, CCL12, SRPX2, PLXDC1, CCR2, HBEGF  |
| GOTERM_BP_DIRECTORY | GO:0006915~apoptotic process                         | 26 | 0.0845444 | E2F1, TNFRSF21, S100A8, S100A9, GPR65, GPX1, CASP3, DYNLL1, COMP, HMOX1, PAK1, AATK, CKAP2, CDK1, C5AR1, NCF1, LGALS1, TPX2, BIRC5, TOX3, LSP1, LCN2, RASSF5, SERPINA3G, SULF1, BUB1B |
| GOTERM_BP_DIRECTORY | GO:0030335~positive regulation of cell migration     | 25 | 5.49E-08  | C3AR1, FERMT3, CCR1, ITGB3, MMP3, LGR6, TGFB2, CXCL10, PTK2B, PDGFC, RHOD, PAK1, GPNMB, CSF1R, FN1, BMP4, BMP2, NTF3, PDPN, MYO1F, KDR, CORO1A, CARMIL1, HBEGF, COL1A1                |
| GOTERM_BP_DIRECTORY | GO:0042493~response to drug                          | 25 | 3.44E-04  | PAM, CDK1, TSPO, HMGB2, HSP90AA1, STAR, LGALS1, MMP9, ANXA1, NCKAP1L, AQP7, TGFB2, KDR, LCN2, NCAM1, INHBA, CYBB, CD86, SFRP1, APOD, PTK2B, PTN, COL1A1, LOX, NNMT                    |
| GOTERM_BP_DIRECTORY | GO:0008285~negative regulation of cell proliferation | 25 | 0.0019405 | BMP4, CEBPA, NOX4, BMP2, CYP1B1, PTPRF, IFITM1, CLMN, TLR2, FRZB, SLFN1, TGFB2, IFIT3, HIST1H2AP, ALDH1A2, INHBA, RASSF5, WISP2, SFRP1, SERPINE2, BTG2, PTK2B, HMOX1, RGCC, CSF1R     |
| GOTERM_BP_DIRECTORY | GO:0006935~chemotaxis                                | 22 | 2.20E-10  | PIK3CG, C3AR1, HMGB2, C5AR1, S100A8, CCR1, S100A9, CCL9, CCL8, ACKR2, NCKAP1L, PF4, ACKR4, CCL6, CXCL10, LSP1, CCL12, DOCK2, CCR5, RAC2, CCR2, PTAFR                                  |
| GOTERM_BP_DIRECTORY | GO:0001666~response to hypoxia                       | 22 | 1.35E-06  | EGR1, NOX4, PAM, BMP2, TLR2, POSTN, KCNA5, TACC3,                                                                                                                                     |

|                      |                                                            |    |                |                                                                                                                                       |
|----------------------|------------------------------------------------------------|----|----------------|---------------------------------------------------------------------------------------------------------------------------------------|
|                      |                                                            |    |                | CD24A, KDR, TGFB2, PTGIS, ALAS2, PENK, PTK2B, UCP2, ANG, HMOX1, PAK1, NOS2, NPPA, ANGPTL4                                             |
| GOTERM_BP_DIR<br>ECT | GO:0070374~positive regulation of ERK1 and ERK2 cascade    | 21 | 3.70E-06       | NOX4, BMP4, BMP2, C5AR1, C3, CCR1, CCL9, TLR2, CCL8, ITGB3, CCL6, KDR, GLIPR2, CCL12, CTGF, PTK2B, ANGPT1, PDGFC, TREM2, GPNMB, CSF1R |
| GOTERM_BP_DIR<br>ECT | GO:0007568~aging                                           | 18 | 5.43E-05       | NOX4, TSPO, COL3A1, ITGB2, SERPING1, AURKB, TIMP1, NCAM1, CDKN1C, CD86, PPP1R9A, APOD, PENK, SERPINF1, CTGF, UCP2, IFI27L2A, CTSC     |
| GOTERM_BP_DIR<br>ECT | GO:0042127~regulation of cell proliferation                | 18 | 0.001328<br>29 | CEBPA, TRNP1, PRG4, HCK, TNC, IL4RA, ANXA1, S100A11, NR3C2, PF4, SPARC, TGFB2, CXCL10, PLA2G4A, PTK2B, SERPINE1, PRDM1, NOS2          |
| GOTERM_BP_DIR<br>ECT | GO:0030593~neutrophil chemotaxis                           | 17 | 5.32E-10       | C5AR1, S100A8, LGALS3, S100A9, CCL9, CCL8, NCKAP1L, ITGB2, VAV1, ITGAM, CCL6, TGFB2, FCGR3, CCL12, FCER1G, CSF3R, SPP1                |
| GOTERM_BP_DIR<br>ECT | GO:0045766~positive regulation of angiogenesis             | 17 | 2.07E-06       | C3AR1, CYP1B1, C5AR1, LGALS3, C3, MMP9, ITGB2, ITGB3, ECM1, KDR, CYBB, PTGIS, PTK2B, LRG1, HMOX1, SERPINE1, HSPB1                     |
| GOTERM_BP_DIR<br>ECT | GO:0043524~negative regulation of neuron apoptotic process | 17 | 7.25E-05       | C5AR1, STAR, NTF3, LGMN, CRLF1, PRKCG, BIRC5, TOX3, KDR, CCL12, CORO1A, BTG2, PTK2B, HMOX1, MT1, ANGPT1, ADAM8                        |
| GOTERM_BP_DIR<br>ECT | GO:0032496~response to lipopolysaccharide                  | 17 | 7.75E-04       | TNFRSF21, HMGB2, C5AR1, S100A8, NCF2, TLR2, ACP5, PF4, SPARC, CXCL10, SLC11A1, ACE, PENK, LBP, NOS2, LOXL1, PTAFR                     |
| GOTERM_BP_DIR<br>ECT | GO:0071222~cellular response to lipopolysaccharide         | 17 | 0.001450<br>26 | ZFP36, MRC1, TSPO, HMGB2, STAR, FCGR4, ANKRD1, CD180, CXCL10, LCN2, CD86, NR1D1, SERPINE1, LBP, NOS2, CD300LB, CD14                   |
| GOTERM_BP_DIR<br>ECT | GO:0008283~cell proliferation                              | 17 | 0.002447<br>31 | PTPN6, CDK1, MKI67, CFB, PDPN, NCF1, UCHL1, DACH1,                                                                                    |

|                      |                                                         |    |            |                                                                                                                   |
|----------------------|---------------------------------------------------------|----|------------|-------------------------------------------------------------------------------------------------------------------|
|                      |                                                         |    |            | ENPEP, AURKB, TACC3, GPX1, GLUL, UHRF1, TGFB1, MYC, CSF1R                                                         |
| GOTERM_BP_DIR<br>ECT | GO:0050729~positive regulation of inflammatory response | 16 | 1.25E-09   | S100A8, LDLR, S100A9, TLR2, CCL9, CCL8, CTSS, CCL6, CCL12, ACE, PLA2G4A, CCR5, SERPINE1, CCR2, TGM2, ADAM8        |
| GOTERM_BP_DIR<br>ECT | GO:0016477~cell migration                               | 16 | 0.0015656  | PTPRF, ENPEP, ITGB3, SIRPA, CD24A, COL5A1, TGFB2, KDR, CORO1A, CTGF, ANG, CARMIL1, PSTPIP1, HBEGF, ADAMTS12, LCP1 |
| GOTERM_BP_DIR<br>ECT | GO:0010629~negative regulation of gene expression       | 16 | 0.02825209 | BMP4, HMGB2, BMP2, LDLR, CCR1, IQGAP3, TGFB2, ACE, SFRP1, SERPINF1, CTGF, CD46, SERPINE1, PRDM1, NOS2, MYC        |
| GOTERM_BP_DIR<br>ECT | GO:0042060~wound healing                                | 15 | 2.14E-06   | S100A8, TNC, COL3A1, FCGR4, SPARC, MMP12, TGFB2, TIMP1, SLC11A1, HPSE, SERPINE1, COL1A1, LOX, PAK1, FN1           |
| GOTERM_BP_DIR<br>ECT | GO:0001503~ossification                                 | 15 | 2.76E-06   | BMP4, BMP2, IFITM1, CTGF, MMP9, FSTL3, MGP, PTN, SPARC, TMEM119, COL11A2, ECM1, COL5A2, SPP1, AHSG                |
| GOTERM_BP_DIR<br>ECT | GO:0008360~regulation of cell shape                     | 15 | 1.87E-04   | PDPN, PLXNB1, HCK, ANXA1, RHOU, S100A13, KDR, CCL12, MYO10, CORO1A, PTK2B, PTN, PAKAP, CSF1R, FN1                 |
| GOTERM_BP_DIR<br>ECT | GO:0071356~cellular response to tumor necrosis factor   | 14 | 6.19E-05   | CEBPA, ZFP36, TNFRSF21, CCL9, CCL8, POSTN, ANKRD1, CCL6, LCN2, CCL12, SFRP1, COL1A1, ADAMTS12, DBN1               |
| GOTERM_BP_DIR<br>ECT | GO:0002250~adaptive immune response                     | 14 | 6.43E-04   | TNFRSF21, ADGRE1, CTLA4, ANXA1, CTSS, CLEC4N, CD84, PIRB, ALCAM, CD86, PTK2B, SERPINA3G, CLEC4A2, PRDM1           |
| GOTERM_BP_DIR<br>ECT | GO:0007507~heart development                            | 14 | 0.08797785 | BMP4, ALDH1A2, PAM, CASP3, BMP2, DNAAF3, XIRP2, MMP9, COL3A1, PTN, SPARC, LOX, TGFB2, IFT74                       |
| GOTERM_BP_DIR<br>ECT | GO:0030199~collagen fibril organization                 | 13 | 2.32E-09   | COL14A1, CYP1B1, COL3A1, COL1A2, COL1A1, LOX, COL11A2, SCX, ADAMTS2, COL5A2, COL5A1, TGFB2, ANXA2                 |

|                      |                                                                       |    |                |                                                                                                     |
|----------------------|-----------------------------------------------------------------------|----|----------------|-----------------------------------------------------------------------------------------------------|
| GOTERM_BP_DIR<br>ECT | GO:0071347~cellular<br>response to interleukin-1                      | 13 | 1.05E-05       | LCN2, CCL12, PTGIS, SFRP1,<br>SERPINE1, CCL9, SAA3, CCL8,<br>ANKRD1, ADAMTS12, MYC,<br>CCL6, FN1    |
| GOTERM_BP_DIR<br>ECT | GO:0009615~response to<br>virus                                       | 13 | 1.75E-05       | IFITM1, TLR13, CLU, OAS3,<br>CXCL10, IFIT3, LCN2, IFI27L2A,<br>OASL1, HSPB1, STMN1, MST1R,<br>MX1   |
| GOTERM_BP_DIR<br>ECT | GO:0007229~integrin-<br>mediated signaling<br>pathway                 | 13 | 4.95E-05       | PLEK, FERMT3, COL3A1, ITGB2,<br>ITGB3, VAV1, ITGAM, CTGF,<br>PTK2B, ITGB6, FCER1G,<br>ADAM8, TYROBP |
| GOTERM_BP_DIR<br>ECT | GO:0030324~lung<br>development                                        | 13 | 7.58E-04       | BMP4, CEBPA, PDPN, FSTL3,<br>MGP, SPARC, KDR, ALDH1A2,<br>EIF4EBP1, CTGF, PTN, LOX,<br>ADAMTS2      |
| GOTERM_BP_DIR<br>ECT | GO:0001934~positive<br>regulation of protein<br>phosphorylation       | 13 | 0.018018<br>6  | BMP4, BMP2, C3, MMP9,<br>IQGAP3, PLAUR, ANXA2, KDR,<br>CTGF, AKAP5, PAK1, GPNMB,<br>CSF1R           |
| GOTERM_BP_DIR<br>ECT | GO:0002244~hematopoieti<br>c progenitor cell<br>differentiation       | 12 | 3.54E-04       | BMP4, PTPN6, INHBA, SFRP1,<br>PLEK, KCNAB2, PLD4, FSTL3,<br>ANLN, SIRPA, TOP2A, SMPD3               |
| GOTERM_BP_DIR<br>ECT | GO:0032355~response to<br>estradiol                                   | 12 | 4.60E-04       | ALDH1A2, PAM, PENK, DUSP1,<br>CTGF, GRN, ANXA1, PTN,<br>POSTN, COL1A1, FCGR1, MYC                   |
| GOTERM_BP_DIR<br>ECT | GO:0030198~extracellular<br>matrix organization                       | 12 | 0.001272<br>36 | NEPN, LGALS3, ADAMTSL2,<br>HPSE, SPOCK2, MMP9, COMP,<br>TGFB1, CCDC80, POSTN, TGFB2,<br>FN1         |
| GOTERM_BP_DIR<br>ECT | GO:0045471~response to<br>ethanol                                     | 12 | 0.001571<br>81 | CDK1, EIF4EBP1, TBXAS1,<br>S100A8, STAR, PENK, PTK2B,<br>TNC, SPARC, CDO1, MYC, CD14                |
| GOTERM_BP_DIR<br>ECT | GO:0010976~positive<br>regulation of neuron<br>projection development | 12 | 0.005659<br>02 | BMP4, PPP1R9A, SCN1B,<br>SERPINE2, SERPINF1, PTK2B,<br>GRN, PTN, HSPB1, ANKRD1,<br>CD24A, DBN1      |
| GOTERM_BP_DIR<br>ECT | GO:0019221~cytokine-<br>mediated signaling<br>pathway                 | 12 | 0.008538<br>5  | CEBPA, PIRB, ASPN, CCL12,<br>PTPN6, BGN, CSF2RB2, CCR2,<br>CSF2RB, PF4, PTPRN, CSF1R                |
| GOTERM_BP_DIR<br>ECT | GO:0051607~defense<br>response to virus                               | 12 | 0.021494<br>71 | IFIT3, CD86, ISG15, IFITM1,<br>SLFN9, OASL1, OAS3, IFIT3B,<br>MX1, TLR7, ZBP1, CXCL10               |
| GOTERM_BP_DIR<br>ECT | GO:0051260~protein<br>homooligomerization                             | 12 | 0.059272<br>59 | IKBKE, PAM, GLUL, P2RX6,<br>HMOX1, TGM2, ANGPT1,<br>KCNA5, SLC1A1, KCN2, THBS4,<br>ANGPTL4          |

|                      |                                                                                |    |                |                                                                                                   |
|----------------------|--------------------------------------------------------------------------------|----|----------------|---------------------------------------------------------------------------------------------------|
| GOTERM_BP_DIR<br>ECT | GO:0007160~cell-matrix<br>adhesion                                             | 11 | 2.20E-04       | SNED1, CTGF, HPSE, COL3A1,<br>ITGB6, ITGB2, ITGB3,<br>ADAMTS12, ADAM8, SIRPA,<br>FN1              |
| GOTERM_BP_DIR<br>ECT | GO:0048661~positive<br>regulation of smooth<br>muscle cell proliferation       | 11 | 2.71E-04       | EGR1, BMP4, C3AR1, WISP1,<br>HMOX1, SULF1, TGM2, HBEGF,<br>ITGB3, MYC, PTAFR                      |
| GOTERM_BP_DIR<br>ECT | GO:0030308~negative<br>regulation of cell growth                               | 11 | 0.007943<br>21 | RTN4, INHBA, CGREF1, SFRP1,<br>SERPINE2, FHL1, OSGIN1, FRZB,<br>NPPA, TGFB2, AHSG                 |
| GOTERM_BP_DIR<br>ECT | GO:0007411~axon<br>guidance                                                    | 11 | 0.024627<br>52 | ALCAM, NCAM1, EPHA4, ENAH,<br>SCN1B, EFNB3, NTF3, CD24A,<br>TUBB3, CSF1R, TGFB2                   |
| GOTERM_BP_DIR<br>ECT | GO:0071560~cellular<br>response to transforming<br>growth factor beta stimulus | 10 | 1.52E-04       | NOX4, STAR, SFRP1, PENK,<br>SERPINE1, POSTN, COL1A1,<br>ANKRD1, SCX, DBN1                         |
| GOTERM_BP_DIR<br>ECT | GO:0071407~cellular<br>response to organic cyclic<br>compound                  | 10 | 7.37E-04       | CEBPA, CCL12, P2RY6, BMP2,<br>MSR1, CYP1B1, LGALS1, NOS2,<br>PAK1, ANKRD1                         |
| GOTERM_BP_DIR<br>ECT | GO:0007015~actin filament<br>organization                                      | 10 | 0.001531<br>25 | ENAH, CORO1A, PPP1R9A,<br>RAC2, PTK2B, ACTN1, SIRPA,<br>WAS, DBN1, PAKAP                          |
| GOTERM_BP_DIR<br>ECT | GO:0030097~hemopoiesis                                                         | 10 | 0.001965<br>46 | SFRP1, IKZF1, CCR2, ANGPT1,<br>HBB-BS, HBB-BT, TACC3, CSF1R,<br>TGFB2, KDR                        |
| GOTERM_BP_DIR<br>ECT | GO:0050830~defense<br>response to Gram-positive<br>bacterium                   | 10 | 0.003363<br>74 | LYZ2, HMGB2, C5AR1, ANG,<br>NCF1, HCK, TLR2, MYO1F,<br>ACP5, LBP                                  |
| GOTERM_BP_DIR<br>ECT | GO:0071456~cellular<br>response to hypoxia                                     | 10 | 0.006596<br>66 | E2F1, EIF4EBP1, PTGIS, SFRP1,<br>HMOX1, RGCC, PTN, ANKRD1,<br>ADAM8, CCNA2                        |
| GOTERM_BP_DIR<br>ECT | GO:0001501~skeletal<br>system development                                      | 10 | 0.008409<br>81 | BMP4, CDKN1C, LGALS3,<br>MMP9, COL3A1, COL1A2,<br>COL1A1, COL11A2, COL5A2,<br>TGFB2               |
| GOTERM_BP_DIR<br>ECT | GO:0008584~male gonad<br>development                                           | 10 | 0.011180<br>95 | INHBA, HMGB2, NUPR1, STAR,<br>SFRP1, FSTL3, ASPM, TGFB2,<br>AHSG, KDR                             |
| GOTERM_BP_DIR<br>ECT | GO:0001649~osteoblast<br>differentiation                                       | 10 | 0.011808<br>68 | BMP4, BMP2, SFRP1, PENK,<br>TNC, MRC2, COL1A1, GPNMB,<br>TMEM119, SPP1                            |
| GOTERM_BP_DIR<br>ECT | GO:0010466~negative<br>regulation of peptidase<br>activity                     | 10 | 0.014585<br>21 | SERPINA3N, SERPINE2,<br>SERPINA3G, SERPINE1,<br>SERPINB1A, BIRC5, SERPING1,<br>PAPLN, ECM1, TIMP1 |



|                      |                                                                          |    |                |                                                                              |
|----------------------|--------------------------------------------------------------------------|----|----------------|------------------------------------------------------------------------------|
| GOTERM_BP_DIR<br>ECT | GO:0001822~kidney<br>development                                         | 10 | 0.026939<br>6  | BMP4, CDKN1C, ALDH1A2, ACE,<br>SERPINF1, SULF1, WNT9B,<br>FSTL3, CYS1, TGFB2 |
| GOTERM_BP_DIR<br>ECT | GO:0034765~regulation of<br>ion transmembrane<br>transport               | 10 | 0.033231<br>39 | CLCN1, KCNQ4, CYBB, SCN1B,<br>KCNA2, SCN4B, KCNA5, CLIC1,<br>KCNV2, SCN4A    |
| GOTERM_BP_DIR<br>ECT | GO:0030036~actin<br>cytoskeleton organization                            | 10 | 0.043646<br>45 | GAS2L3, CORO2A, ENAH,<br>CORO1A, DOCK2, SFRP1, RAC2,<br>XIRP2, PAK1, RHO     |
| GOTERM_BP_DIR<br>ECT | GO:0000281~mitotic<br>cytokinesis                                        | 9  | 3.85E-06       | CKAP2, KIF23, PLK1, KIF4,<br>NUSAP1, ANLN, STMN1,<br>RACGAP1, KIF20A         |
| GOTERM_BP_DIR<br>ECT | GO:0050766~positive<br>regulation of phagocytosis                        | 9  | 1.48E-04       | SLC11A1, DOCK2, FCGR2B, C3,<br>FCER1G, FCGR1, SIRPA, FCGR3,<br>AHSG          |
| GOTERM_BP_DIR<br>ECT | GO:0070098~chemokine-<br>mediated signaling<br>pathway                   | 9  | 3.90E-04       | CCL12, PTK2B, CCR1, CCR2,<br>CCL9, CCL8, PF4, CCL6, CXCL10                   |
| GOTERM_BP_DIR<br>ECT | GO:0042542~response to<br>hydrogen peroxide                              | 9  | 5.64E-04       | GPX1, CASP3, STAR, DUSP1,<br>PTK2B, HMOX1, HP, COL1A1,<br>KCNA5              |
| GOTERM_BP_DIR<br>ECT | GO:0032760~positive<br>regulation of tumor<br>necrosis factor production | 9  | 6.34E-04       | CCR5, CLU, TLR2, FCER1G, PF4,<br>LBP, SASH3, PTAFR, CD14                     |
| GOTERM_BP_DIR<br>ECT | GO:0048839~inner ear<br>development                                      | 9  | 0.001344<br>87 | CEBPA, C1QB, BMP2, IGFBP7,<br>SPARC, CYS1, CDH23, TGFB2,<br>IFI204           |
| GOTERM_BP_DIR<br>ECT | GO:0001938~positive<br>regulation of endothelial<br>cell proliferation   | 9  | 0.001484<br>39 | BMP4, BMP2, HMGB2, ANG,<br>LRG1, ITGB3, ECM1, THBS4,<br>KDR                  |
| GOTERM_BP_DIR<br>ECT | GO:0071346~cellular<br>response to interferon-<br>gamma                  | 9  | 0.001635<br>15 | MRC1, CCL12, STAR, CCL9,<br>CCL8, H2-AB1, NOS2, MYC,<br>CCL6                 |
| GOTERM_BP_DIR<br>ECT | GO:0016525~negative<br>regulation of angiogenesis                        | 9  | 0.002363<br>29 | SERPINF1, CCR2, RGCC, SULF1,<br>PTN, PF4, SPARC, THBS4,<br>CXCL10            |
| GOTERM_BP_DIR<br>ECT | GO:0043627~response to<br>estrogen                                       | 9  | 0.003059<br>56 | ARPC1B, HSP90AA1, STAR,<br>HMOX1, IL4RA, RCAN1, PTPRN,<br>CD24A, TGFB2       |
| GOTERM_BP_DIR<br>ECT | GO:0007018~microtubule-<br>based movement                                | 9  | 0.003905<br>84 | KIF23, KIF22, KIFC1, KIF11, KIF6,<br>KIF4, KIF20B, CENPE, KIF20A             |
| GOTERM_BP_DIR<br>ECT | GO:0060326~cell<br>chemotaxis                                            | 9  | 0.003905<br>84 | CCL12, HMGB2, CCL9, SAA3,<br>CCL8, HBEGF, BIN2, CCL6,<br>CXCL10              |
| GOTERM_BP_DIR<br>ECT | GO:0060548~negative<br>regulation of cell death                          | 9  | 0.004563<br>29 | NCAM1, BMP4, NPAS2, WISP2,<br>WISP1, CTGF, CTSB, ITGB3,<br>MYC               |

|                      |                                                                    |   |                |                                                                         |
|----------------------|--------------------------------------------------------------------|---|----------------|-------------------------------------------------------------------------|
| GOTERM_BP_DIR<br>ECT | GO:0051897~positive<br>regulation of protein kinase<br>B signaling | 9 | 0.014100<br>39 | NOX4, PIK3CG, GPX1, HPSE,<br>HBEGF, ANGPT1, PIK3R5,<br>MST1R, ADAM8     |
| GOTERM_BP_DIR<br>ECT | GO:0031175~neuron<br>projection development                        | 9 | 0.085934<br>06 | NCAM1, EFHD1, PPP1R9A,<br>BTG2, PTK2B, CLMN, TNC,<br>CNTNAP1, CD24A     |
| GOTERM_BP_DIR<br>ECT | GO:0030574~collagen<br>catabolic process                           | 8 | 8.20E-06       | CTSK, MMP9, MRC2, MMP19,<br>CTSB, CTSS, MMP3, ADAMTS2                   |
| GOTERM_BP_DIR<br>ECT | GO:0042130~negative<br>regulation of T cell<br>proliferation       | 8 | 2.80E-04       | TNFRSF21, PTPN6, CTLA4, H2-<br>AA, H2-AB1, GPNMB, VSIG4,<br>SLFN1       |
| GOTERM_BP_DIR<br>ECT | GO:0051496~positive<br>regulation of stress fiber<br>assembly      | 8 | 5.15E-04       | NOX4, PPM1E, CTGF, CARMIL1,<br>RGCC, GPR65, S100A10, PAK1               |
| GOTERM_BP_DIR<br>ECT | GO:0006909~phagocytosis                                            | 8 | 0.001435<br>36 | SLC11A1, CORO1A, HCK, PLD4,<br>ANXA1, ITGB2, VAV1, CD302                |
| GOTERM_BP_DIR<br>ECT | GO:0043408~regulation of<br>MAPK cascade                           | 8 | 0.003008<br>35 | INHBB, INHBA, BMP2, TLR13,<br>PAK1, GDF15, CD24A, TGFB2                 |
| GOTERM_BP_DIR<br>ECT | GO:0009612~response to<br>mechanical stimulus                      | 8 | 0.004363<br>2  | INHBB, BTG2, PTK2B, TNC,<br>COL3A1, RCAN1, POSTN,<br>KCNA5              |
| GOTERM_BP_DIR<br>ECT | GO:0048812~neuron<br>projection morphogenesis                      | 8 | 0.004363<br>2  | NBL1, PLXNB1, CLU, KIF20B,<br>CNTNAP1, PAK1, THBS4, KDR                 |
| GOTERM_BP_DIR<br>ECT | GO:0048146~positive<br>regulation of fibroblast<br>proliferation   | 8 | 0.005192<br>55 | E2F1, SERPINE1, PDGFC, ITGB3,<br>MYC, CCNA2, FN1, ANXA2                 |
| GOTERM_BP_DIR<br>ECT | GO:0006461~protein<br>complex assembly                             | 8 | 0.005649<br>05 | CDK1, NUPR1, TSPAN4,<br>SLC2A1, NCKAP1L, MGP, PF4,<br>AHSG              |
| GOTERM_BP_DIR<br>ECT | GO:0000165~MAPK<br>cascade                                         | 8 | 0.007199<br>28 | ZFP36, SLC11A1, CCL12, DOK1,<br>PTK2B, PLVAP, ITPKB, MYC                |
| GOTERM_BP_DIR<br>ECT | GO:0001568~blood vessel<br>development                             | 8 | 0.008394<br>54 | BMP4, ALDH1A2, COL3A1,<br>COL1A2, COL1A1, LOX,<br>COL5A1, TGFB2         |
| GOTERM_BP_DIR<br>ECT | GO:0043434~response to<br>peptide hormone                          | 8 | 0.009729<br>65 | SERPINA3N, BTG2, CTGF,<br>SERPINA3G, ANXA1, COL1A1,<br>SPARC, TIMP1     |
| GOTERM_BP_DIR<br>ECT | GO:0009749~response to<br>glucose                                  | 8 | 0.013736<br>9  | EGR1, CASP3, GLUL, NCF2,<br>CTGF, PTK2B, ILDR2, PTPRN                   |
| GOTERM_BP_DIR<br>ECT | GO:0034097~response to<br>cytokine                                 | 8 | 0.016642<br>92 | ALDH1A2, CORO1A,<br>SERPINA3N, SERPINA3G,<br>COL3A1, ACP5, SPARC, TIMP1 |
| GOTERM_BP_DIR<br>ECT | GO:0050728~negative<br>regulation of inflammatory<br>response      | 8 | 0.023709<br>72 | ZFP36, TNFAIP8L2, IER3, PTGIS,<br>SERPINF1, AOA, ACP5,<br>CTLA2A        |
| GOTERM_BP_DIR<br>ECT | GO:0007059~chromosome<br>segregation                               | 8 | 0.026463<br>89 | KIF11, SPAG5, INCENP, BIRC5,<br>CENPE, ESPL1, KNSTRN, TOP2A             |

|                      |                                                                             |   |                |                                                          |
|----------------------|-----------------------------------------------------------------------------|---|----------------|----------------------------------------------------------|
| GOTERM_BP_DIR<br>ECT | GO:0007169~transmembrane receptor protein tyrosine kinase signaling pathway | 8 | 0.045518<br>26 | DOK1, EPHA4, NTF3, HCK, ANGPT1, CSF1R, LCP2, KDR         |
| GOTERM_BP_DIR<br>ECT | GO:0050731~positive regulation of peptidyl-tyrosine phosphorylation         | 8 | 0.047595<br>06 | NTF3, PTK2B, HBEGF, ANGPT1, ITGB3, TREM2, CD24A, THBS4   |
| GOTERM_BP_DIR<br>ECT | GO:0030336~negative regulation of cell migration                            | 8 | 0.058877<br>07 | CYP1B1, SFRP1, CCR5, IFITM1, SERPINE1, SULF1, PTN, DACH1 |
| GOTERM_BP_DIR<br>ECT | GO:0000070~mitotic sister chromatid segregation                             | 7 | 7.46E-05       | CDCA8, MAD2L1, PLK1, SPAG5, NUSAP1, ESPL1, KNSTRN        |
| GOTERM_BP_DIR<br>ECT | GO:0050715~positive regulation of cytokine secretion                        | 7 | 7.32E-04       | CD300C2, PANX1, RGCC, TLR2, CLEC5A, CLEC4N, CD14         |
| GOTERM_BP_DIR<br>ECT | GO:0006953~acute-phase response                                             | 7 | 8.60E-04       | SERPINA3N, SAA3, HP, LBP, FN1, AHSG, CD163               |
| GOTERM_BP_DIR<br>ECT | GO:0000910~cytokinesis                                                      | 7 | 0.001164<br>99 | KIF23, PRC1, PLK1, INCENP, PSTPIP1, BIRC5, KIF20A        |
| GOTERM_BP_DIR<br>ECT | GO:0014911~positive regulation of smooth muscle cell migration              | 7 | 0.001547<br>17 | NOX4, EGR1, P2RY6, CYP1B1, POSTN, ITGB3, MYC             |
| GOTERM_BP_DIR<br>ECT | GO:0002548~monocyte chemotaxis                                              | 7 | 0.001770<br>71 | CCL12, LGALS3, CCR2, ANXA1, CCL9, CCL8, CCL6             |
| GOTERM_BP_DIR<br>ECT | GO:0010811~positive regulation of cell-substrate adhesion                   | 7 | 0.002290<br>3  | FBLN2, SPOCK2, CCDC80, PTN, COL8A1, DBN1, SPP1           |
| GOTERM_BP_DIR<br>ECT | GO:0045429~positive regulation of nitric oxide biosynthetic process         | 7 | 0.003274<br>61 | HSP90AA1, ASS1, PTK2B, CLU, TLR2, ITGB2, SMPD3           |
| GOTERM_BP_DIR<br>ECT | GO:0006911~phagocytosis, engulfment                                         | 7 | 0.003274<br>61 | FCGR2B, FCER1G, TREM2, FCGR1, SIRPA, BIN2, FCGR3         |
| GOTERM_BP_DIR<br>ECT | GO:0032956~regulation of actin cytoskeleton organization                    | 7 | 0.005570<br>39 | PAM, CORO1A, MYO1F, SH3BGRL3, PAK1, ITGB3, TGFB2         |
| GOTERM_BP_DIR<br>ECT | GO:0051591~response to cAMP                                                 | 7 | 0.006142<br>78 | DUSP1, PTK2B, MMP19, COL1A1, SPARC, PTPRN, CDO1          |
| GOTERM_BP_DIR<br>ECT | GO:0031100~organ regeneration                                               | 7 | 0.009661<br>94 | CDK1, ACE, C5AR1, MKI67, CCNA2, LCP1, NNMT               |
| GOTERM_BP_DIR<br>ECT | GO:0051603~proteolysis involved in cellular protein catabolic process       | 7 | 0.010508<br>57 | CTSZ, CTSK, LGMN, CTSC, CTSB, CTSS, ADAMTS12             |
| GOTERM_BP_DIR<br>ECT | GO:0009611~response to wounding                                             | 7 | 0.011406<br>48 | ZFP36, GPX1, CASP3, SERPINE2, MYC, LCP1, TGFB2           |
| GOTERM_BP_DIR<br>ECT | GO:0008217~regulation of blood pressure                                     | 7 | 0.015541<br>11 | C3AR1, ACE, CYP4F18, HMOX1, COL1A2, ENPEP, NPPA          |
| GOTERM_BP_DIR<br>ECT | GO:0071300~cellular response to retinoic acid                               | 7 | 0.019252<br>11 | ALDH1A2, SERPINF1, PTK2B, TNC, CYP26B1, COL1A1, MYC      |

|                      |                                                                                              |   |            |                                                   |
|----------------------|----------------------------------------------------------------------------------------------|---|------------|---------------------------------------------------|
| GOTERM_BP_DIR<br>ECT | GO:0045669~positive regulation of osteoblast differentiation                                 | 7 | 0.02352531 | CEBPA, BMP4, BMP2, IFITM1, CLIC1, TMEM119, IFI204 |
| GOTERM_BP_DIR<br>ECT | GO:0050679~positive regulation of epithelial cell proliferation                              | 7 | 0.03789315 | BMP4, GLUL, C5AR1, SFRP1, GRN, MYC, KDR           |
| GOTERM_BP_DIR<br>ECT | GO:0060395~SMAD protein signal transduction                                                  | 7 | 0.04000908 | BMP4, INHBB, INHBA, BMP2, VIM, GDF15, TGFB2       |
| GOTERM_BP_DIR<br>ECT | GO:0006821~chloride transport                                                                | 7 | 0.04679943 | CLCN1, TSPO, CLCA3A1, GABRA3, ANO1, ANO5, CLIC1   |
| GOTERM_BP_DIR<br>ECT | GO:0051216~cartilage development                                                             | 7 | 0.05169963 | BMP4, BMP2, SULF1, MGP, COL11A2, SCX, TIMP1       |
| GOTERM_BP_DIR<br>ECT | GO:0042535~positive regulation of tumor necrosis factor biosynthetic process                 | 6 | 3.80E-05   | CYBB, CCR2, TLR2, HSPB1, LBP, FCGR3               |
| GOTERM_BP_DIR<br>ECT | GO:0002523~leukocyte migration involved in inflammatory response                             | 6 | 3.80E-05   | S100A8, S100A9, ITGB2, ADAM8, CD24A, ITGAM        |
| GOTERM_BP_DIR<br>ECT | GO:0019886~antigen processing and presentation of exogenous peptide antigen via MHC class II | 6 | 5.75E-05   | FCGR2B, H2-EB1, IFI30, FCER1G, H2-AA, H2-AB1      |
| GOTERM_BP_DIR<br>ECT | GO:0033630~positive regulation of cell adhesion mediated by integrin                         | 6 | 8.39E-05   | PTPN6, NCKAP1L, ITGB3, CD24A, TGFB2, IFT74        |
| GOTERM_BP_DIR<br>ECT | GO:0030261~chromosome condensation                                                           | 6 | 1.19E-04   | CDK1, NCAPH, NCAPG2, SMC2, TOP2A, SMC4            |
| GOTERM_BP_DIR<br>ECT | GO:2000573~positive regulation of DNA biosynthetic process                                   | 6 | 2.21E-04   | NOX4, C3AR1, CYP1B1, PTK2B, RGCC, MYC             |
| GOTERM_BP_DIR<br>ECT | GO:0030889~negative regulation of B cell proliferation                                       | 6 | 2.21E-04   | TNFRSF21, CASP3, FCGR2B, CTLA4, PRDM1, CD24A      |
| GOTERM_BP_DIR<br>ECT | GO:0010575~positive regulation of vascular endothelial growth factor production              | 6 | 9.30E-04   | C3AR1, C5AR1, CYP1B1, HPSE, C3, SULF1             |
| GOTERM_BP_DIR<br>ECT | GO:0045453~bone resorption                                                                   | 6 | 0.00113194 | NOX4, CTSK, RAC2, PTK2B, ACP5, CTSS               |
| GOTERM_BP_DIR<br>ECT | GO:0090023~positive regulation of neutrophil chemotaxis                                      | 6 | 0.00193139 | C3AR1, C5AR1, RAC2, NCKAP1L, LBP, THBS4           |
| GOTERM_BP_DIR<br>ECT | GO:0044344~cellular response to fibroblast growth factor stimulus                            | 6 | 0.00265402 | ZFP36, STAR, SFRP1, POSTN, COL1A1, MYC            |

|                      |                                                                                   |   |                |                                            |
|----------------------|-----------------------------------------------------------------------------------|---|----------------|--------------------------------------------|
| GOTERM_BP_DIR<br>ECT | GO:0048147~negative regulation of fibroblast proliferation                        | 6 | 0.003554<br>56 | NUPR1, SFRP1, MMP9, IFI30, DACH1, MYC      |
| GOTERM_BP_DIR<br>ECT | GO:0009617~response to bacterium                                                  | 6 | 0.005288<br>22 | SLC11A1, FCGR2B, NCF1, TLR2, FCGR1, CD14   |
| GOTERM_BP_DIR<br>ECT | GO:0045786~negative regulation of cell cycle                                      | 6 | 0.005979<br>32 | CEBPA, BMP4, INHBA, CASP3, BMP2, NUPR1     |
| GOTERM_BP_DIR<br>ECT | GO:0040007~growth                                                                 | 6 | 0.005979<br>32 | BMP4, INHBB, INHBA, BMP2, CCNB2, TGFB2     |
| GOTERM_BP_DIR<br>ECT | GO:0070527~platelet aggregation                                                   | 6 | 0.007547<br>59 | PTPN6, PLEK, FERMT3, HSPB1, ITGB3, CLIC1   |
| GOTERM_BP_DIR<br>ECT | GO:0010595~positive regulation of endothelial cell migration                      | 6 | 0.010404<br>02 | BMP4, PTK2B, ANGPT1, SPARC, ITGB3, KDR     |
| GOTERM_BP_DIR<br>ECT | GO:0006879~cellular iron ion homeostasis                                          | 6 | 0.015254<br>87 | LCN2, SLC11A1, ALAS2, FTL1, HMOX1, MYC     |
| GOTERM_BP_DIR<br>ECT | GO:0010862~positive regulation of pathway-restricted SMAD protein phosphorylation | 6 | 0.019750<br>28 | BMP4, INHBB, INHBA, BMP2, GDF15, TGFB2     |
| GOTERM_BP_DIR<br>ECT | GO:0045600~positive regulation of fat cell differentiation                        | 6 | 0.021422<br>13 | CEBPA, ZFP36, BMP2, MEDAG, SFRP1, FRZB     |
| GOTERM_BP_DIR<br>ECT | GO:0031532~actin cytoskeleton reorganization                                      | 6 | 0.026980<br>24 | PARVG, PLEK, S100A9, ANXA1, GPR65, PAK1    |
| GOTERM_BP_DIR<br>ECT | GO:0032755~positive regulation of interleukin-6 production                        | 6 | 0.026980<br>24 | RAB7B, CCR5, TLR2, FCER1G, LBP, TLR7       |
| GOTERM_BP_DIR<br>ECT | GO:0008630~intrinsic apoptotic signaling pathway in response to DNA damage        | 6 | 0.031151<br>25 | E2F1, IER3, IKBKE, BCL2A1B, HMOX1, MYC     |
| GOTERM_BP_DIR<br>ECT | GO:0043406~positive regulation of MAP kinase activity                             | 6 | 0.031151<br>25 | NOX4, PIK3CG, PIK3R5, PDGFC, MST1R, CD24A  |
| GOTERM_BP_DIR<br>ECT | GO:0006958~complement activation, classical pathway                               | 6 | 0.033379<br>87 | C1QA, C1QB, C4B, C3, SERPING1, C1QC        |
| GOTERM_BP_DIR<br>ECT | GO:0035914~skeletal muscle cell differentiation                                   | 6 | 0.033379<br>87 | EGR1, NUPR1, BTG2, ANKRD1, SCX, MYC        |
| GOTERM_BP_DIR<br>ECT | GO:0045785~positive regulation of cell adhesion                                   | 6 | 0.035705<br>16 | TGM2, ANGPT1, RHOD, ADAM8, VAV1, APBB1IP   |
| GOTERM_BP_DIR<br>ECT | GO:0001541~ovarian follicle development                                           | 6 | 0.038127<br>91 | BMP4, INHBA, MMP19, ANGPT1, MYC, KDR       |
| GOTERM_BP_DIR<br>ECT | GO:0001558~regulation of cell growth                                              | 6 | 0.040648<br>8  | WISP2, WISP1, CTGF, IGFBP7, IGFBP6, CSF2RB |

|                      |                                                                           |   |                |                                               |
|----------------------|---------------------------------------------------------------------------|---|----------------|-----------------------------------------------|
| GOTERM_BP_DIR<br>ECT | GO:0006898~receptor-mediated endocytosis                                  | 6 | 0.045987<br>13 | MRC1, MSR1, FTL1, FCGR2B, FCGR1, CD14         |
| GOTERM_BP_DIR<br>ECT | GO:0000082~G1/S transition of mitotic cell cycle                          | 6 | 0.051723<br>26 | INHBA, EIF4EBP1, RGCC, IQGAP3, TCF19, RHOU    |
| GOTERM_BP_DIR<br>ECT | GO:0042102~positive regulation of T cell proliferation                    | 6 | 0.057858<br>5  | CORO1A, CD86, CD46, ANXA1, NCKAP1L, SASH3     |
| GOTERM_BP_DIR<br>ECT | GO:0014068~positive regulation of phosphatidylinositol 3-kinase signaling | 6 | 0.057858<br>5  | PTPN6, PLXNB1, ANGPT1, PDGFC, TGFB2, KDR      |
| GOTERM_BP_DIR<br>ECT | GO:0018108~peptidyl-tyrosine phosphorylation                              | 6 | 0.061075<br>69 | PTPN6, EPHA4, PTK2B, HCK, CSF1R, KDR          |
| GOTERM_BP_DIR<br>ECT | GO:0010033~response to organic substance                                  | 6 | 0.061075<br>69 | PLA2G4A, CASP3, CTSC, KCNA5, PAK1, SPP1       |
| GOTERM_BP_DIR<br>ECT | GO:0051592~response to calcium ion                                        | 6 | 0.071322<br>67 | PLA2G4A, TRPC3, PENK, DUSP1, PTK2B, SPARC     |
| GOTERM_BP_DIR<br>ECT | GO:0071333~cellular response to glucose stimulus                          | 6 | 0.082452<br>71 | NOX4, GPX1, STAR, SERPINF1, UCP2, LGALS1      |
| GOTERM_BP_DIR<br>ECT | GO:0045165~cell fate commitment                                           | 6 | 0.086355<br>83 | BMP4, CASP3, BMP2, WNT9B, PRDM1, KDR          |
| GOTERM_BP_DIR<br>ECT | GO:0050680~negative regulation of epithelial cell proliferation           | 6 | 0.086355<br>83 | BMP4, CDKN1C, SFRP1, PTN, TGFB2, IFT74        |
| GOTERM_BP_DIR<br>ECT | GO:0006812~cation transport                                               | 6 | 0.090354<br>08 | PANX1, SLC24A3, SLC41A2, ANO1, SLC41A3, SCN4A |
| GOTERM_BP_DIR<br>ECT | GO:0051384~response to glucocorticoid                                     | 6 | 0.098631<br>93 | PAM, PTGDS, DUSP1, ASS1, SPARC, CDO1          |
| GOTERM_BP_DIR<br>ECT | GO:0043206~extracellular fibril organization                              | 5 | 3.10E-04       | LTBP2, COL3A1, MFAP4, MFAP5, COL5A1           |
| GOTERM_BP_DIR<br>ECT | GO:0035457~cellular response to interferon-alpha                          | 5 | 4.54E-04       | IFIT3, STAR, IFIT3B, MYC, IFI204              |
| GOTERM_BP_DIR<br>ECT | GO:0045576~mast cell activation                                           | 5 | 6.38E-04       | CD48, FCGR2B, FCER1G, FCGR3, LCP2             |
| GOTERM_BP_DIR<br>ECT | GO:0090026~positive regulation of monocyte chemotaxis                     | 5 | 8.71E-04       | CCR1, CCR2, SERPINE1, PLA2G7, CXCL10          |
| GOTERM_BP_DIR<br>ECT | GO:0006956~complement activation                                          | 5 | 0.001156<br>59 | MASP1, C4B, C3, CFB, RGCC                     |
| GOTERM_BP_DIR<br>ECT | GO:0006693~prostaglandin metabolic process                                | 5 | 0.001156<br>59 | TBXAS1, PTGIS, PTGDS, PDPN, HPGDS             |
| GOTERM_BP_DIR<br>ECT | GO:0007051~spindle organization                                           | 5 | 0.001502<br>54 | KIF11, SPAG5, AURKB, KNSTRN, ASPM             |

|                      |                                                                                                    |   |                |                                         |
|----------------------|----------------------------------------------------------------------------------------------------|---|----------------|-----------------------------------------|
| GOTERM_BP_DIR<br>ECT | GO:0016064~immunoglobulin mediated immune response                                                 | 5 | 0.005170<br>19 | FCGR2B, C4B, IRF7, IL4RA, FCER1G        |
| GOTERM_BP_DIR<br>ECT | GO:1902042~negative regulation of extrinsic apoptotic signaling pathway via death domain receptors | 5 | 0.008276<br>26 | GPX1, HMGB2, TNFRSF23, HMOX1, SERPINE1  |
| GOTERM_BP_DIR<br>ECT | GO:0034341~response to interferon-gamma                                                            | 5 | 0.009533       | SLC11A1, CD86, IFITM1, H2-EB1, H2-AA    |
| GOTERM_BP_DIR<br>ECT | GO:0048821~erythrocyte development                                                                 | 5 | 0.010907<br>47 | HBA-A1, HBA-A2, NCKAP1L, HBB-BS, HBB-BT |
| GOTERM_BP_DIR<br>ECT | GO:0035987~endodermal cell differentiation                                                         | 5 | 0.010907<br>47 | INHBA, MMP9, COL12A1, COL8A1, FN1       |
| GOTERM_BP_DIR<br>ECT | GO:0048247~lymphocyte chemotaxis                                                                   | 5 | 0.021818<br>93 | CCL12, CCL9, CCL8, ADAM8, CCL6          |
| GOTERM_BP_DIR<br>ECT | GO:0010718~positive regulation of epithelial to mesenchymal transition                             | 5 | 0.024107<br>38 | GLIPR2, BMP2, RGCC, COL1A1, TGFB2       |
| GOTERM_BP_DIR<br>ECT | GO:0090307~mitotic spindle assembly                                                                | 5 | 0.026535<br>66 | KIFC1, KIF11, TPX2, BIRC5, CDC20        |
| GOTERM_BP_DIR<br>ECT | GO:0071773~cellular response to BMP stimulus                                                       | 5 | 0.026535<br>66 | BMP4, BMP2, SFRP1, ADAMTS12, SCX        |
| GOTERM_BP_DIR<br>ECT | GO:0048754~branching morphogenesis of an epithelial tube                                           | 5 | 0.029105<br>21 | BMP4, WNT9B, MGP, PAK1, KDR             |
| GOTERM_BP_DIR<br>ECT | GO:0002931~response to ischemia                                                                    | 5 | 0.029105<br>21 | EGR1, EIF4EBP1, PANX1, UCHL1, RCAN1     |
| GOTERM_BP_DIR<br>ECT | GO:0007346~regulation of mitotic cell cycle                                                        | 5 | 0.031817<br>16 | CDKN1C, PLK1, FBXO5, BIRC5, MYC         |
| GOTERM_BP_DIR<br>ECT | GO:0030177~positive regulation of Wnt signaling pathway                                            | 5 | 0.031817<br>16 | BMP2, SFRP1, SULF1, TLR2, LGR6          |
| GOTERM_BP_DIR<br>ECT | GO:0006910~phagocytosis, recognition                                                               | 5 | 0.034672<br>41 | COLEC12, CLEC7A, FCGR1, SIRPA, FCGR3    |
| GOTERM_BP_DIR<br>ECT | GO:0048873~homeostasis of number of cells within a tissue                                          | 5 | 0.034672<br>41 | CORO1A, COL14A1, CCR2, ILDR2, SASH3     |
| GOTERM_BP_DIR<br>ECT | GO:0034605~cellular response to heat                                                               | 5 | 0.037671<br>54 | MKI67, HMOX1, ANO1, MYOF, CXCL10        |
| GOTERM_BP_DIR<br>ECT | GO:0007162~negative regulation of cell adhesion                                                    | 5 | 0.047534<br>36 | LPXN, PLXNB1, TNC, MYO1F, ANGPT1        |
| GOTERM_BP_DIR<br>ECT | GO:0048706~embryonic skeletal system development                                                   | 5 | 0.054828<br>5  | BMP4, SULF1, ETL4, COL1A1, SCX          |
| GOTERM_BP_DIR<br>ECT | GO:0002062~chondrocyte differentiation                                                             | 5 | 0.062691<br>33 | BMP4, BMP2, TGFB1, COL11A2, SCX         |

|                      |                                                                                                         |   |                |                                         |
|----------------------|---------------------------------------------------------------------------------------------------------|---|----------------|-----------------------------------------|
| GOTERM_BP_DIR<br>ECT | GO:0007265~Ras protein<br>signal transduction                                                           | 5 | 0.066833<br>2  | CNKS1R1, DOK1, DOK3, IQGAP3,<br>CCNA2   |
| GOTERM_BP_DIR<br>ECT | GO:0010942~positive<br>regulation of cell death                                                         | 5 | 0.071113<br>47 | EGR1, BMP4, CTGF, UCP2, HP              |
| GOTERM_BP_DIR<br>ECT | GO:0030218~erythrocyte<br>differentiation                                                               | 5 | 0.071113<br>47 | BMP4, CASP3, ALAS2, IKZF1,<br>SPI1      |
| GOTERM_BP_DIR<br>ECT | GO:0009725~response to<br>hormone                                                                       | 5 | 0.071113<br>47 | PTK2B, ANG, MMP19, LOX,<br>TIMP1        |
| GOTERM_BP_DIR<br>ECT | GO:0060291~long-term<br>synaptic potentiation                                                           | 5 | 0.075530<br>47 | SERPINE2, RASGRF2, PTK2B,<br>SYT12, PTN |
| GOTERM_BP_DIR<br>ECT | GO:0071320~cellular<br>response to cAMP                                                                 | 5 | 0.080082<br>39 | NOX4, PIK3CG, STAR, PENK,<br>PTAFR      |
| GOTERM_BP_DIR<br>ECT | GO:0006936~muscle<br>contraction                                                                        | 5 | 0.080082<br>39 | CLCN1, MYBPC2, ANXA1,<br>MYH7, ANXA2    |
| GOTERM_BP_DIR<br>ECT | GO:0019882~antigen<br>processing and<br>presentation                                                    | 5 | 0.099596<br>88 | RAB32, H2-EB1, H2-AA, H2-<br>AB1, CTSS  |
| GOTERM_BP_DIR<br>ECT | GO:0048002~antigen<br>processing and<br>presentation of peptide<br>antigen                              | 4 | 1.36E-04       | SLC11A1, H2-AA, H2-AB1, CTSS            |
| GOTERM_BP_DIR<br>ECT | GO:0098869~cellular<br>oxidant detoxification                                                           | 4 | 3.31E-04       | HBA-A1, HBA-A2, HBB-BS, HBB-<br>BT      |
| GOTERM_BP_DIR<br>ECT | GO:0042590~antigen<br>processing and<br>presentation of exogenous<br>peptide antigen via MHC<br>class I | 4 | 3.31E-04       | IFI30, FCER1G, FCGR1, FCGR3             |
| GOTERM_BP_DIR<br>ECT | GO:0051256~mitotic<br>spindle midzone assembly                                                          | 4 | 6.45E-04       | KIF23, KIF4, AURKB, RACGAP1             |
| GOTERM_BP_DIR<br>ECT | GO:0045730~respiratory<br>burst                                                                         | 4 | 0.001101<br>95 | SLC11A1, CYBB, NCF1, CD24A              |
| GOTERM_BP_DIR<br>ECT | GO:0001798~positive<br>regulation of type IIa<br>hypersensitivity                                       | 4 | 0.001720<br>39 | C3, FCER1G, FCGR1, FCGR3                |
| GOTERM_BP_DIR<br>ECT | GO:0071223~cellular<br>response to lipoteichoic<br>acid                                                 | 4 | 0.002518<br>16 | TLR2, LBP, TREM2, CD14                  |
| GOTERM_BP_DIR<br>ECT | GO:0071305~cellular<br>response to vitamin D                                                            | 4 | 0.003510<br>48 | SFRP1, PENK, TNC, PTN                   |
| GOTERM_BP_DIR<br>ECT | GO:0008347~glial cell<br>migration                                                                      | 4 | 0.004710<br>53 | EPHA4, TSPO, TGFB2, FN1                 |
| GOTERM_BP_DIR<br>ECT | GO:0042554~superoxide<br>anion generation                                                               | 4 | 0.004710<br>53 | NOX4, CYBB, NCF2, NCF1                  |
| GOTERM_BP_DIR<br>ECT | GO:0050777~negative<br>regulation of immune<br>response                                                 | 4 | 0.004710<br>53 | FCGR2B, COL3A1, CTLA4,<br>TGFB2         |



|                      |                                                                                             |   |                |                                |
|----------------------|---------------------------------------------------------------------------------------------|---|----------------|--------------------------------|
| GOTERM_BP_DIR<br>ECT | GO:0071276~cellular response to cadmium ion                                                 | 4 | 0.006129<br>54 | CYBB, STAR, HMOX1, MT2         |
| GOTERM_BP_DIR<br>ECT | GO:0010447~response to acidic pH                                                            | 4 | 0.006129<br>54 | SERPINF1, LGMN, GPR65, CTSS    |
| GOTERM_BP_DIR<br>ECT | GO:0007076~mitotic chromosome condensation                                                  | 4 | 0.007776<br>93 | NCAPH, NUSAP1, SMC2, SMC4      |
| GOTERM_BP_DIR<br>ECT | GO:0033690~positive regulation of osteoblast proliferation                                  | 4 | 0.007776<br>93 | BMP2, HPSE, ITGB3, TMEM119     |
| GOTERM_BP_DIR<br>ECT | GO:0051279~regulation of release of sequestered calcium ion into cytosol                    | 4 | 0.009660<br>49 | PTPN6, CORO1A, PTK2B, ITGB3    |
| GOTERM_BP_DIR<br>ECT | GO:2000249~regulation of actin cytoskeleton reorganization                                  | 4 | 0.011786<br>47 | PTK2B, GMFG, RHOD, CSF1R       |
| GOTERM_BP_DIR<br>ECT | GO:0045019~negative regulation of nitric oxide biosynthetic process                         | 4 | 0.011786<br>47 | TSPO, PTGIS, DYNLL1, ACP5      |
| GOTERM_BP_DIR<br>ECT | GO:0030502~negative regulation of bone mineralization                                       | 4 | 0.011786<br>47 | PTK2B, CCR1, ECM1, AHSG        |
| GOTERM_BP_DIR<br>ECT | GO:0050918~positive chemotaxis                                                              | 4 | 0.011786<br>47 | BMP4, CORO1A, LGALS3, ANGPT1   |
| GOTERM_BP_DIR<br>ECT | GO:0055008~cardiac muscle tissue morphogenesis                                              | 4 | 0.014159<br>68 | BMP2, XIRP2, ANGPT1, ANKRD1    |
| GOTERM_BP_DIR<br>ECT | GO:0001516~prostaglandin biosynthetic process                                               | 4 | 0.014159<br>68 | TBXAS1, PTGIS, PTGDS, HPGDS    |
| GOTERM_BP_DIR<br>ECT | GO:0002224~toll-like receptor signaling pathway                                             | 4 | 0.016783<br>65 | CD86, TLR2, TLR7, CD180        |
| GOTERM_BP_DIR<br>ECT | GO:0007094~mitotic spindle assembly checkpoint                                              | 4 | 0.019660<br>68 | MAD2L1, PLK1, BUB1B, CENPE     |
| GOTERM_BP_DIR<br>ECT | GO:0070542~response to fatty acid                                                           | 4 | 0.022791<br>99 | TBXAS1, CTGF, UCP2, TLR2       |
| GOTERM_BP_DIR<br>ECT | GO:0016339~calcium-dependent cell-cell adhesion via plasma membrane cell adhesion molecules | 4 | 0.022791<br>99 | CDH22, PCDHGA12, PCDH12, CDH23 |
| GOTERM_BP_DIR<br>ECT | GO:0006801~superoxide metabolic process                                                     | 4 | 0.022791<br>99 | NOX4, CYBB, NCF2, NOS2         |
| GOTERM_BP_DIR<br>ECT | GO:1901741~positive regulation of myoblast fusion                                           | 4 | 0.022791<br>99 | IL4RA, CCL8, CD53, GDF15       |
| GOTERM_BP_DIR<br>ECT | GO:0007088~regulation of mitotic nuclear division                                           | 4 | 0.026177<br>76 | MKI67, KIF20B, FBXO5, CENPE    |

|                      |                                                                          |   |                |                                  |
|----------------------|--------------------------------------------------------------------------|---|----------------|----------------------------------|
| GOTERM_BP_DIR<br>ECT | GO:0022409~positive regulation of cell-cell adhesion                     | 4 | 0.026177<br>76 | MYO10, CCR5, FSTL3, CD24A        |
| GOTERM_BP_DIR<br>ECT | GO:0045780~positive regulation of bone resorption                        | 4 | 0.026177<br>76 | ITGB3, ADAM8, SPP1, AHSG         |
| GOTERM_BP_DIR<br>ECT | GO:0030517~negative regulation of axon extension                         | 4 | 0.026177<br>76 | RTN4, CCR5, FSTL4, AATK          |
| GOTERM_BP_DIR<br>ECT | GO:0071398~cellular response to fatty acid                               | 4 | 0.029817<br>26 | E2F1, OLF78, LDLR, PTAFR         |
| GOTERM_BP_DIR<br>ECT | GO:0045648~positive regulation of erythrocyte differentiation            | 4 | 0.029817<br>26 | INHBA, HMGB2, ISG15, NCKAP1L     |
| GOTERM_BP_DIR<br>ECT | GO:0090280~positive regulation of calcium ion import                     | 4 | 0.029817<br>26 | CCL12, LGALS3, SERPINE1, GM34302 |
| GOTERM_BP_DIR<br>ECT | GO:0048870~cell motility                                                 | 4 | 0.029817<br>26 | MYO10, SRPX2, PDPN, CCDC80       |
| GOTERM_BP_DIR<br>ECT | GO:0022617~extracellular matrix disassembly                              | 4 | 0.033708<br>9  | MMP19, MMP3, MMP12, LCP1         |
| GOTERM_BP_DIR<br>ECT | GO:0002687~positive regulation of leukocyte migration                    | 4 | 0.033708<br>9  | CCL12, MMP9, TLR2, ITGB3         |
| GOTERM_BP_DIR<br>ECT | GO:0030595~leukocyte chemotaxis                                          | 4 | 0.033708<br>9  | CORO1A, CCR1, S100A9, PF4        |
| GOTERM_BP_DIR<br>ECT | GO:0032733~positive regulation of interleukin-10 production              | 4 | 0.037850<br>34 | CD46, TLR2, FCER1G, SASH3        |
| GOTERM_BP_DIR<br>ECT | GO:0036120~cellular response to platelet-derived growth factor stimulus  | 4 | 0.037850<br>34 | PTN, ITGB3, MYC, CCNA2           |
| GOTERM_BP_DIR<br>ECT | GO:0007159~leukocyte cell-cell adhesion                                  | 4 | 0.042238<br>5  | FERMT3, ITGB2, CD24A, ITGAM      |
| GOTERM_BP_DIR<br>ECT | GO:0030833~regulation of actin filament polymerization                   | 4 | 0.042238<br>5  | ARPC1B, CORO1A, PPP1R9A, DBN1    |
| GOTERM_BP_DIR<br>ECT | GO:0050850~positive regulation of calcium-mediated signaling             | 4 | 0.042238<br>5  | NCAM1, TREM2, CD24A, KDR         |
| GOTERM_BP_DIR<br>ECT | GO:0032757~positive regulation of interleukin-8 production               | 4 | 0.046869<br>72 | SERPINE1, TLR2, LBP, TLR7        |
| GOTERM_BP_DIR<br>ECT | GO:0048010~vascular endothelial growth factor receptor signaling pathway | 4 | 0.046869<br>72 | PTK2B, SULF1, VAV1, KDR          |

|                      |                                                                             |   |                |                                |
|----------------------|-----------------------------------------------------------------------------|---|----------------|--------------------------------|
| GOTERM_BP_DIR<br>ECT | GO:0045662~negative regulation of myoblast differentiation                  | 4 | 0.051739<br>73 | BMP4, CCL9, NMRK2, CXCL10      |
| GOTERM_BP_DIR<br>ECT | GO:0032967~positive regulation of collagen biosynthetic process             | 4 | 0.051739<br>73 | BMP4, CTGF, RGCC, SCX          |
| GOTERM_BP_DIR<br>ECT | GO:0030325~adrenal gland development                                        | 4 | 0.056843<br>76 | CDKN1C, DKK3, TSPO, FSTL3      |
| GOTERM_BP_DIR<br>ECT | GO:0042476~odontogenesis                                                    | 4 | 0.056843<br>76 | MYO5A, BMP4, INHBA, PAM        |
| GOTERM_BP_DIR<br>ECT | GO:0030099~myeloid cell differentiation                                     | 4 | 0.056843<br>76 | CEBPA, CDKN1C, CCR1, CLEC5A    |
| GOTERM_BP_DIR<br>ECT | GO:2000352~negative regulation of endothelial cell apoptotic process        | 4 | 0.062176<br>59 | SERPINE1, ANGPT1, ANGPTL4, KDR |
| GOTERM_BP_DIR<br>ECT | GO:0007052~mitotic spindle organization                                     | 4 | 0.062176<br>59 | WDR62, GPSM2, STMN1, AURKB     |
| GOTERM_BP_DIR<br>ECT | GO:0031214~biomineral tissue development                                    | 4 | 0.067732<br>6  | ASPN, TMEM119, ECM1, SPP1      |
| GOTERM_BP_DIR<br>ECT | GO:0032570~response to progesterone                                         | 4 | 0.073505<br>79 | TSPO, TLR2, PTN, TGFB2         |
| GOTERM_BP_DIR<br>ECT | GO:0031663~lipopolysaccharide-mediated signaling pathway                    | 4 | 0.079489<br>88 | CCL12, LBP, TREM2, CD14        |
| GOTERM_BP_DIR<br>ECT | GO:2000379~positive regulation of reactive oxygen species metabolic process | 4 | 0.079489<br>88 | NOX4, TSPO, CYP1B1, PTK2B      |
| GOTERM_BP_DIR<br>ECT | GO:0043029~T cell homeostasis                                               | 4 | 0.079489<br>88 | CORO1A, CASP3, CCNB2, NCKAP1L  |
| GOTERM_BP_DIR<br>ECT | GO:0043388~positive regulation of DNA binding                               | 4 | 0.085678<br>28 | HMGB2, MMP9, MYC, PLAUR        |
| GOTERM_BP_DIR<br>ECT | GO:0061077~chaperone-mediated protein folding                               | 4 | 0.085678<br>28 | FKBP5, CLU, TTC9, FKBP11       |
| GOTERM_BP_DIR<br>ECT | GO:2000134~negative regulation of G1/S transition of mitotic cell cycle     | 4 | 0.085678<br>28 | FHL1, SLFN9, GPNMB, SLFN1      |
| GOTERM_BP_DIR<br>ECT | GO:0045071~negative regulation of viral genome replication                  | 4 | 0.085678<br>28 | ISG15, IFITM1, OASL1, OAS3     |
| GOTERM_BP_DIR<br>ECT | GO:0050776~regulation of immune response                                    | 4 | 0.085678<br>28 | CLEC12A, FCER1G, FCGR1, FCGR3  |
| GOTERM_BP_DIR<br>ECT | GO:0032147~activation of protein kinase activity                            | 4 | 0.092064<br>22 | SLC11A1, TPX2, ITGB3, TGFB2    |
| GOTERM_BP_DIR<br>ECT | GO:0032467~positive regulation of cytokinesis                               | 4 | 0.092064<br>22 | KIF23, KIF20B, AURKB, RACGAP1  |

|                      |                                                                                     |   |                |                               |
|----------------------|-------------------------------------------------------------------------------------|---|----------------|-------------------------------|
| GOTERM_BP_DIR<br>ECT | GO:1900026~positive regulation of substrate adhesion-dependent cell spreading       | 4 | 0.092064<br>22 | CARMIL1, S100A10, ITGB3, DBN1 |
| GOTERM_BP_DIR<br>ECT | GO:0071310~cellular response to organic substance                                   | 4 | 0.092064<br>22 | EGR1, CD68, CASP3, IQGAP3     |
| GOTERM_BP_DIR<br>ECT | GO:0042110~T cell activation                                                        | 4 | 0.098640<br>69 | CD48, DOCK2, VAV1, WAS        |
| GOTERM_BP_DIR<br>ECT | GO:0007080~mitotic metaphase plate congression                                      | 4 | 0.098640<br>69 | KIF22, KIFC1, CDCA8, CENPE    |
| GOTERM_BP_DIR<br>ECT | GO:0050769~positive regulation of neurogenesis                                      | 4 | 0.098640<br>69 | ACE, BMP2, STAR, SERPINF1     |
| GOTERM_BP_DIR<br>ECT | GO:0001805~positive regulation of type III hypersensitivity                         | 3 | 0.006124<br>58 | FCER1G, FCGR1, FCGR3          |
| GOTERM_BP_DIR<br>ECT | GO:0060244~negative regulation of cell proliferation involved in contact inhibition | 3 | 0.006124<br>58 | SRPX, DACH1, PAK1             |
| GOTERM_BP_DIR<br>ECT | GO:0014012~peripheral nervous system axon regeneration                              | 3 | 0.009987<br>15 | TSPO, APOD, TNC               |
| GOTERM_BP_DIR<br>ECT | GO:0018119~peptidyl-cysteine S-nitrosylation                                        | 3 | 0.009987<br>15 | S100A8, S100A9, NOS2          |
| GOTERM_BP_DIR<br>ECT | GO:0002693~positive regulation of cellular extravasation                            | 3 | 0.014658<br>05 | PLVAP, ADAM8, PTAFR           |
| GOTERM_BP_DIR<br>ECT | GO:0001936~regulation of endothelial cell proliferation                             | 3 | 0.014658<br>05 | BMP4, ALDH1A2, KDR            |
| GOTERM_BP_DIR<br>ECT | GO:0033622~integrin activation                                                      | 3 | 0.020080<br>49 | FERMT3, COL16A1, FN1          |
| GOTERM_BP_DIR<br>ECT | GO:0051988~regulation of attachment of spindle microtubules to kinetochore          | 3 | 0.020080<br>49 | SPAG5, KNSTRN, RACGAP1        |
| GOTERM_BP_DIR<br>ECT | GO:0051549~positive regulation of keratinocyte migration                            | 3 | 0.026200<br>52 | MMP9, SERPINE1, HBEGF         |
| GOTERM_BP_DIR<br>ECT | GO:0002223~stimulatory C-type lectin receptor signaling pathway                     | 3 | 0.026200<br>52 | FCER1G, CLEC7A, CLEC4N        |
| GOTERM_BP_DIR<br>ECT | GO:0006691~leukotriene metabolic process                                            | 3 | 0.026200<br>52 | NCF1, ALOX5AP, TLR2           |

|                      |                                                                                                      |   |                |                        |
|----------------------|------------------------------------------------------------------------------------------------------|---|----------------|------------------------|
| GOTERM_BP_DIR<br>ECT | GO:0002446~neutrophil mediated immunity                                                              | 3 | 0.026200<br>52 | ACE, MYO1F, CD300LB    |
| GOTERM_BP_DIR<br>ECT | GO:0050810~regulation of steroid biosynthetic process                                                | 3 | 0.026200<br>52 | TSPO, STAR, IGFBP7     |
| GOTERM_BP_DIR<br>ECT | GO:0002675~positive regulation of acute inflammatory response                                        | 3 | 0.026200<br>52 | PIK3CG, ALOX5AP, ADAM8 |
| GOTERM_BP_DIR<br>ECT | GO:0019227~neuronal action potential propagation                                                     | 3 | 0.026200<br>52 | CLCN1, SCN1B, CNTNAP1  |
| GOTERM_BP_DIR<br>ECT | GO:0001878~response to yeast                                                                         | 3 | 0.026200<br>52 | CD86, ANG, NCF1        |
| GOTERM_BP_DIR<br>ECT | GO:0032680~regulation of tumor necrosis factor production                                            | 3 | 0.032966<br>91 | ZFP36, ANGPT1, CD300LD |
| GOTERM_BP_DIR<br>ECT | GO:0060346~bone trabecula formation                                                                  | 3 | 0.032966<br>91 | SFRP1, COL1A1, THBS3   |
| GOTERM_BP_DIR<br>ECT | GO:0042308~negative regulation of protein import into nucleus                                        | 3 | 0.032966<br>91 | APOD, CABP1, ANGPT1    |
| GOTERM_BP_DIR<br>ECT | GO:0031340~positive regulation of vesicle fusion                                                     | 3 | 0.032966<br>91 | PLA2G4A, ANXA1, ANXA2  |
| GOTERM_BP_DIR<br>ECT | GO:0030071~regulation of mitotic metaphase/anaphase transition                                       | 3 | 0.032966<br>91 | PLK1, CENPE, UBE2C     |
| GOTERM_BP_DIR<br>ECT | GO:0060452~positive regulation of cardiac muscle contraction                                         | 3 | 0.032966<br>91 | HSP90AA1, CTGF, NPPA   |
| GOTERM_BP_DIR<br>ECT | GO:0002504~antigen processing and presentation of peptide or polysaccharide antigen via MHC class II | 3 | 0.032966<br>91 | H2-EB1, H2-AA, H2-AB1  |
| GOTERM_BP_DIR<br>ECT | GO:0034501~protein localization to kinetochore                                                       | 3 | 0.040331<br>02 | CDK1, BUB1B, AURKB     |
| GOTERM_BP_DIR<br>ECT | GO:0002827~positive regulation of T-helper 1 type immune response                                    | 3 | 0.040331<br>02 | SLC11A1, CCR2, H2-AB1  |
| GOTERM_BP_DIR<br>ECT | GO:0043534~blood vessel endothelial cell migration                                                   | 3 | 0.040331<br>02 | GPX1, PTK2B, ADAM8     |
| GOTERM_BP_DIR<br>ECT | GO:0006957~complement activation, alternative pathway                                                | 3 | 0.040331<br>02 | CFP, C3, CFB           |
| GOTERM_BP_DIR<br>ECT | GO:0060055~angiogenesis involved in wound healing                                                    | 3 | 0.040331<br>02 | GPX1, HPSE, ITGB3      |

|                      |                                                                      |   |                |                        |
|----------------------|----------------------------------------------------------------------|---|----------------|------------------------|
| GOTERM_BP_DIR<br>ECT | GO:0006809~nitric oxide biosynthetic process                         | 3 | 0.040331<br>02 | HSP90AA1, CYP1B1, NOS2 |
| GOTERM_BP_DIR<br>ECT | GO:0060100~positive regulation of phagocytosis, engulfment           | 3 | 0.048246<br>69 | NCKAP1L, LBP, FCGR1    |
| GOTERM_BP_DIR<br>ECT | GO:0000050~urea cycle                                                | 3 | 0.048246<br>69 | CEBPA, ASS1, GM5424    |
| GOTERM_BP_DIR<br>ECT | GO:0045577~regulation of B cell differentiation                      | 3 | 0.048246<br>69 | PTPN6, NFAM1, CD24A    |
| GOTERM_BP_DIR<br>ECT | GO:0051639~actin filament network formation                          | 3 | 0.048246<br>69 | CARMIL1, ACTN1, LCP1   |
| GOTERM_BP_DIR<br>ECT | GO:0007252~I-kappaB phosphorylation                                  | 3 | 0.056670<br>12 | SAA3, TLR2, TLR7       |
| GOTERM_BP_DIR<br>ECT | GO:0071294~cellular response to zinc ion                             | 3 | 0.056670<br>12 | TSPO, MT2, MT1         |
| GOTERM_BP_DIR<br>ECT | GO:0001542~ovulation from ovarian follicle                           | 3 | 0.056670<br>12 | PLA2G4A, MMP19, NOS2   |
| GOTERM_BP_DIR<br>ECT | GO:0035313~wound healing, spreading of epidermal cells               | 3 | 0.056670<br>12 | HBEGF, COL5A1, MMP12   |
| GOTERM_BP_DIR<br>ECT | GO:0002237~response to molecule of bacterial origin                  | 3 | 0.065559<br>79 | TLR2, CD24A, CD14      |
| GOTERM_BP_DIR<br>ECT | GO:0060317~cardiac epithelial to mesenchymal transition              | 3 | 0.065559<br>79 | RTN4, BMP2, TGFB2      |
| GOTERM_BP_DIR<br>ECT | GO:0010524~positive regulation of calcium ion transport into cytosol | 3 | 0.065559<br>79 | BMP4, TRPC3, AKAP5     |
| GOTERM_BP_DIR<br>ECT | GO:0032743~positive regulation of interleukin-2 production           | 3 | 0.074876<br>34 | CCR2, ANXA1, SASH3     |
| GOTERM_BP_DIR<br>ECT | GO:2000279~negative regulation of DNA biosynthetic process           | 3 | 0.074876<br>34 | DUSP1, DACH1, ANKRD1   |
| GOTERM_BP_DIR<br>ECT | GO:0030194~positive regulation of blood coagulation                  | 3 | 0.074876<br>34 | HPSE, S100A9, SERPINE1 |
| GOTERM_BP_DIR<br>ECT | GO:0001775~cell activation                                           | 3 | 0.074876<br>34 | CD24A, FN1, TIMP1      |
| GOTERM_BP_DIR<br>ECT | GO:0043267~negative regulation of potassium ion transport            | 3 | 0.074876<br>34 | PTK2B, AKAP5, KCNA5    |
| GOTERM_BP_DIR<br>ECT | GO:0051489~regulation of filopodium assembly                         | 3 | 0.074876<br>34 | MYO10, PPP1R9A, DBN1   |
| GOTERM_BP_DIR<br>ECT | GO:0060252~positive regulation of glial cell proliferation           | 3 | 0.074876<br>34 | TSPO, VIM, MYC         |

|                      |                                                                                                 |   |                |                        |
|----------------------|-------------------------------------------------------------------------------------------------|---|----------------|------------------------|
| GOTERM_BP_DIR<br>ECT | GO:0030225~macrophage differentiation                                                           | 3 | 0.074876<br>34 | CEBPA, BMP4, SPI1      |
| GOTERM_BP_DIR<br>ECT | GO:0006518~peptide metabolic process                                                            | 3 | 0.074876<br>34 | PAM, ACE, AEBP1        |
| GOTERM_BP_DIR<br>ECT | GO:0030949~positive regulation of vascular endothelial growth factor receptor signaling pathway | 3 | 0.074876<br>34 | BMP4, ANGPT1, KDR      |
| GOTERM_BP_DIR<br>ECT | GO:0042573~retinoic acid metabolic process                                                      | 3 | 0.084582<br>47 | ALDH1A2, RBP1, CYP26B1 |
| GOTERM_BP_DIR<br>ECT | GO:0033627~cell adhesion mediated by integrin                                                   | 3 | 0.084582<br>47 | ITGB6, ITGB3, COL16A1  |
| GOTERM_BP_DIR<br>ECT | GO:0061351~neural precursor cell proliferation                                                  | 3 | 0.084582<br>47 | TRNP1, GRN, DBN1       |
| GOTERM_BP_DIR<br>ECT | GO:2001241~positive regulation of extrinsic apoptotic signaling pathway in absence of ligand    | 3 | 0.084582<br>47 | INHBA, SRPX, TGFB2     |
| GOTERM_BP_DIR<br>ECT | GO:0007263~nitric oxide mediated signal transduction                                            | 3 | 0.084582<br>47 | MT2, MT1, NOS2         |
| GOTERM_BP_DIR<br>ECT | GO:2000649~regulation of sodium ion transmembrane transporter activity                          | 3 | 0.094642<br>87 | SCN1B, SCN4B, FXYD5    |
| GOTERM_BP_DIR<br>ECT | GO:0002755~MyD88-dependent toll-like receptor signaling pathway                                 | 3 | 0.094642<br>87 | TLR13, TLR2, TLR7      |
| GOTERM_BP_DIR<br>ECT | GO:0010288~response to lead ion                                                                 | 3 | 0.094642<br>87 | NCAM1, STAR, SPARC     |
| GOTERM_BP_DIR<br>ECT | GO:2000406~positive regulation of T cell migration                                              | 3 | 0.094642<br>87 | ITGB3, ADAM8, CXCL10   |
| GOTERM_BP_DIR<br>ECT | GO:0061036~positive regulation of cartilage development                                         | 3 | 0.094642<br>87 | BMP4, BMP2, SCX        |
| GOTERM_BP_DIR<br>ECT | GO:0032270~positive regulation of cellular protein metabolic process                            | 3 | 0.094642<br>87 | INHBA, UHRF1, PTK2B    |
| GOTERM_BP_DIR<br>ECT | GO:0031529~ruffle organization                                                                  | 3 | 0.094642<br>87 | PLEK, CARMIL1, CSF1R   |
| GOTERM_BP_DIR<br>ECT | GO:0070488~neutrophil aggregation                                                               | 2 | 0.064302<br>35 | S100A8, S100A9         |
| GOTERM_BP_DIR<br>ECT | GO:2000098~negative regulation of smooth muscle cell-matrix adhesion                            | 2 | 0.064302<br>35 | APOD, SERPINE1         |

|                      |                                                                                                  |   |                |                  |
|----------------------|--------------------------------------------------------------------------------------------------|---|----------------|------------------|
| GOTERM_BP_DIR<br>ECT | GO:0003130~BMP signaling pathway involved in heart induction                                     | 2 | 0.064302<br>35 | BMP4, BMP2       |
| GOTERM_BP_DIR<br>ECT | GO:0071373~cellular response to luteinizing hormone stimulus                                     | 2 | 0.064302<br>35 | STAR, CCNA2      |
| GOTERM_BP_DIR<br>ECT | GO:0000915~actomyosin contractile ring assembly                                                  | 2 | 0.064302<br>35 | KIF23, RACGAP1   |
| GOTERM_BP_DIR<br>ECT | GO:0031449~regulation of slow-twitch skeletal muscle fiber contraction                           | 2 | 0.064302<br>35 | GM34302, MYH7    |
| GOTERM_BP_DIR<br>ECT | GO:1903225~negative regulation of endodermal cell differentiation                                | 2 | 0.064302<br>35 | COL5A2, COL5A1   |
| GOTERM_BP_DIR<br>ECT | GO:0051383~kinetochore organization                                                              | 2 | 0.094888<br>49 | SMC2, SMC4       |
| GOTERM_BP_DIR<br>ECT | GO:0031577~spindle checkpoint                                                                    | 2 | 0.094888<br>49 | BIRC5, AURKB     |
| GOTERM_BP_DIR<br>ECT | GO:0002246~wound healing involved in inflammatory response                                       | 2 | 0.094888<br>49 | HMOX1, CCR2      |
| GOTERM_BP_DIR<br>ECT | GO:0035993~deltoid tuberosity development                                                        | 2 | 0.094888<br>49 | BMP4, SCX        |
| GOTERM_BP_DIR<br>ECT | GO:0010046~response to mycotoxin                                                                 | 2 | 0.094888<br>49 | LCN2, ASS1       |
| GOTERM_BP_DIR<br>ECT | GO:0035989~tendon development                                                                    | 2 | 0.094888<br>49 | SCX, COL5A1      |
| GOTERM_BP_DIR<br>ECT | GO:0071603~endothelial cell-cell adhesion                                                        | 2 | 0.094888<br>49 | CYP1B1, THBS4    |
| GOTERM_BP_DIR<br>ECT | GO:0072138~mesenchymal cell proliferation involved in ureteric bud development                   | 2 | 0.094888<br>49 | BMP4, BMP2       |
| GOTERM_BP_DIR<br>ECT | GO:0000053~argininosuccinate metabolic process                                                   | 2 | 0.094888<br>49 | ASS1, GM5424     |
| GOTERM_BP_DIR<br>ECT | GO:1901509~regulation of endothelial tube morphogenesis                                          | 2 | 0.094888<br>49 | ADAMTS12, CXCL10 |
| GOTERM_BP_DIR<br>ECT | GO:0071378~cellular response to growth hormone stimulus                                          | 2 | 0.094888<br>49 | STAR, MYC        |
| GOTERM_BP_DIR<br>ECT | GO:0002924~negative regulation of humoral immune response mediated by circulating immunoglobulin | 2 | 0.094888<br>49 | PTPN6, FCGR2B    |



|                      |                                                                     |   |                |                |
|----------------------|---------------------------------------------------------------------|---|----------------|----------------|
| GOTERM_BP_DIR<br>ECT | GO:2001180~negative<br>regulation of interleukin-10<br>secretion    | 2 | 0.094888<br>49 | CD84, TNFRSF21 |
| GOTERM_BP_DIR<br>ECT | GO:0042376~phylloquinon<br>e catabolic process                      | 2 | 0.094888<br>49 | CYP4F18, CBR3  |
| GOTERM_BP_DIR<br>ECT | GO:0009609~response to<br>symbiotic bacterium                       | 2 | 0.094888<br>49 | GPX1, PTAFR    |
| GOTERM_BP_DIR<br>ECT | GO:0071727~cellular<br>response to triacyl bacterial<br>lipopeptide | 2 | 0.094888<br>49 | TLR2, CD14     |
| GOTERM_BP_DIR<br>ECT | GO:0061035~regulation of<br>cartilage development                   | 2 | 0.094888<br>49 | BMP4, SCX      |
