# Supplementary material
Source: PubMed Central journal article supplement (PMC9898181)
Supplement: NIHMS1861661-supplement-Supplemental_Publication_Material.pdf [file NIHMS1861661-supplement-Supplemental_Publication_Material.pdf]

### Major Resources Table

In order to allow validation and replication of experiments, all essential research materials listed in the Methods should be included in the Major Resources Table below. Authors are encouraged to use public repositories for protocols, data, code, and other materials and provide persistent identifiers and/or links to repositories when available. Authors may add or delete rows as needed.

#### Animals (in vivo studies)

| Species             | Vendor or Source                    | Background Strain | Sex  | Persistent ID / URL                                                               |
|---------------------|-------------------------------------|-------------------|------|-----------------------------------------------------------------------------------|
| C57BL/6J            | Jackson laboratories, stock #000664 | C57BL/6J          | M, F | <a href="https://www.jax.org/strain/000664">https://www.jax.org/strain/000664</a> |
| ApoE <sup>-/-</sup> | Jackson laboratories, stock #002052 | C57BL/6J          | M, F | <a href="https://www.jax.org/strain/002052">https://www.jax.org/strain/002052</a> |
| NLRP3               | Jackson laboratories, #021302       | C57BL/6J          | M, F | <a href="https://www.jax.org/strain/021302">https://www.jax.org/strain/021302</a> |

#### Genetically Modified Animals

|                 | Species | Vendor or Source | Background Strain | Other Information | Persistent ID / URL |
|-----------------|---------|------------------|-------------------|-------------------|---------------------|
| Parent - Male   |         |                  |                   |                   |                     |
| Parent - Female |         |                  |                   |                   |                     |

#### GEO accession numbers

|                       |           |
|-----------------------|-----------|
| GEO accession numbers | GSE220121 |
|                       |           |

## Antibodies

| Target Antigen | Vendor            | Catalog # | Working concentration | Persistent ID / URL                                                                                                                                                                                                                                                                                                                                 |
|----------------|-------------------|-----------|-----------------------|-----------------------------------------------------------------------------------------------------------------------------------------------------------------------------------------------------------------------------------------------------------------------------------------------------------------------------------------------------|
| CD16/CD32      | Fisher Scientific | BDB553141 | 1:100                 | <a href="https://www.fishersci.com/shop/products/anti-cd16-cd32-clone-2-4g2-bd/BDB553141">https://www.fishersci.com/shop/products/anti-cd16-cd32-clone-2-4g2-bd/BDB553141</a>                                                                                                                                                                       |
| Ly-6C,         | Fisher Scientific | BDB562728 | 1:100                 | <a href="https://www.fishersci.com/shop/products/anti-mouse-ly-6c-pe-cf594-clone-al-21-bd-50-g-pe-cf594/BDB562728">https://www.fishersci.com/shop/products/anti-mouse-ly-6c-pe-cf594-clone-al-21-bd-50-g-pe-cf594/BDB562728</a>                                                                                                                     |
| Ly 6G          | Fisher Scientific | BDB561236 | 1:100                 | <a href="https://www.fishersci.com/shop/products/anti-ly-6g-alexa-fluor-700-clone-1a8-bd-50-g-alexa-fluor-700/BDB561236">https://www.fishersci.com/shop/products/anti-ly-6g-alexa-fluor-700-clone-1a8-bd-50-g-alexa-fluor-700/BDB561236</a>                                                                                                         |
| CD25           | BD biosciences    | 564370    | 1:100                 | <a href="https://www.bdbiosciences.com/en-us/products/reagents/flow-cytometry-reagents/research-reagents/single-color-antibodies-ruo/bv421-rat-anti-mouse-cd25.566228">https://www.bdbiosciences.com/en-us/products/reagents/flow-cytometry-reagents/research-reagents/single-color-antibodies-ruo/bv421-rat-anti-mouse-cd25.566228</a>             |
| Cd8            | Fisher Scientific | BDB561097 | 1:100                 | <a href="https://www.fishersci.com/shop/products/anti-cd8a-pe-cy-7-clone-53-6-7-bd-25-g-pe-cy7/BDB561097">https://www.fishersci.com/shop/products/anti-cd8a-pe-cy-7-clone-53-6-7-bd-25-g-pe-cy7/BDB561097</a>                                                                                                                                       |
| CD192 (CCR2)   | BD biosciences    | 747964    | 1:100                 | <a href="https://www.bdbiosciences.com/en-us/products/reagents/flow-cytometry-reagents/research-reagents/single-color-antibodies-ruo/bv711-rat-anti-mouse-cd192-ccr2.747964">https://www.bdbiosciences.com/en-us/products/reagents/flow-cytometry-reagents/research-reagents/single-color-antibodies-ruo/bv711-rat-anti-mouse-cd192-ccr2.747964</a> |
| F4/80          | Fisher Scientific | BDB565613 | 1:100                 | <a href="https://www.fishersci.com/shop/products/msf4-80-pe-cf594-t45-2342-50ug/BDB565613">https://www.fishersci.com/shop/products/msf4-80-pe-cf594-t45-2342-50ug/BDB565613</a>                                                                                                                                                                     |
| Mer            | BD biosciences    | 747837    | 1:100                 | <a href="https://www.bdbiosciences.com/en-us/products/reagents/flow-cytometry-reagents/research-reagents/single-color-antibodies-ruo/bv421-rat-anti-mouse-mer.747837">https://www.bdbiosciences.com/en-us/products/reagents/flow-cytometry-reagents/research-reagents/single-color-antibodies-ruo/bv421-rat-anti-mouse-mer.747837</a>               |
| CD20           | BD biosciences    | 752753    | 1:100                 | <a href="https://www.bdbiosciences.com/en-us/products/reagents/flow-cytometry-reagents/research-reagents/single-color-antibodies-ruo/bv711-rat-anti-mouse-cd20.752753">https://www.bdbiosciences.com/en-us/products/reagents/flow-cytometry-reagents/research-reagents/single-color-antibodies-ruo/bv711-rat-anti-mouse-cd20.752753</a>             |

|                                                               |                   |                 |       |                                                                                                                                                                                                                                                                                                                                                                                                           |
|---------------------------------------------------------------|-------------------|-----------------|-------|-----------------------------------------------------------------------------------------------------------------------------------------------------------------------------------------------------------------------------------------------------------------------------------------------------------------------------------------------------------------------------------------------------------|
| Il 6                                                          | Fisher Scientific | BDB561363       | 1:100 | <a href="https://www.fishersci.com/shop/products/anti-il-6-alexa-fluor-488-clone-mp5-20f3-bd-50-g-alexa-fluor-488/BDB561363">https://www.fishersci.com/shop/products/anti-il-6-alexa-fluor-488-clone-mp5-20f3-bd-50-g-alexa-fluor-488/BDB561363</a>                                                                                                                                                       |
| CD45                                                          | Fisher Scientific | BDB552848       | 1:100 | <a href="https://www.fishersci.com/shop/products/anti-cd45-pe-cy-7-clone-30-f11-bd-0-1mg-pe-cy-7/BDB552848">https://www.fishersci.com/shop/products/anti-cd45-pe-cy-7-clone-30-f11-bd-0-1mg-pe-cy-7/BDB552848</a>                                                                                                                                                                                         |
| Foxp3                                                         | Fisher Scientific | BDB560408       | 1:100 | <a href="https://www.fishersci.com/shop/products/anti-foxp3-r-pe-clone-mf23-bd/BDB560408">https://www.fishersci.com/shop/products/anti-foxp3-r-pe-clone-mf23-bd/BDB560408</a>                                                                                                                                                                                                                             |
| CD4                                                           | Fisher Scientific | BDB553047       | 1:100 | <a href="https://www.fishersci.com/shop/products/anti-cd4-fitc-clone-rm4-5-bd-1/BDB553047">https://www.fishersci.com/shop/products/anti-cd4-fitc-clone-rm4-5-bd-1/BDB553047</a>                                                                                                                                                                                                                           |
| CD11c                                                         | Fisher Scientific | BDB565872       | 1:100 | <a href="https://www.fishersci.com/shop/products/cd11c-hamster-anti-mouse-apc-r700-clone-n418-bd-horizon-1/BDB565872">https://www.fishersci.com/shop/products/cd11c-hamster-anti-mouse-apc-r700-clone-n418-bd-horizon-1/BDB565872</a>                                                                                                                                                                     |
| CD31                                                          | BD Pharmingen     | 563356          | 1:100 | <a href="https://www.bdbiosciences.com/en-us/products/reagents/flow-cytometry-reagents/research-reagents/single-color-antibodies-ruo/bv421-rat-anti-mouse-cd31.563356">https://www.bdbiosciences.com/en-us/products/reagents/flow-cytometry-reagents/research-reagents/single-color-antibodies-ruo/bv421-rat-anti-mouse-cd31.563356</a>                                                                   |
| CD45                                                          | BD Biosciences    | 567376          | 1:100 | <a href="https://www.bdbiosciences.com/en-us/products/reagents/flow-cytometry-reagents/research-reagents/single-color-antibodies-ruo/alexa-fluor-647-rat-anti-mouse-cd45.567376">https://www.bdbiosciences.com/en-us/products/reagents/flow-cytometry-reagents/research-reagents/single-color-antibodies-ruo/alexa-fluor-647-rat-anti-mouse-cd45.567376</a>                                               |
| Purified Rat Anti-Mouse CD16/CD32                             | BD Pharmingen     | 553141          | 1:100 | <a href="https://www.bdbiosciences.com/en-us/products/reagents/flow-cytometry-reagents/research-reagents/single-color-antibodies-ruo/purified-rat-anti-mouse-cd16-cd32-mouse-bd-fc-block.553141">https://www.bdbiosciences.com/en-us/products/reagents/flow-cytometry-reagents/research-reagents/single-color-antibodies-ruo/purified-rat-anti-mouse-cd16-cd32-mouse-bd-fc-block.553141</a>               |
| NLRP3                                                         | R&D Systems       | IC7578V-100UG   | 1:100 | <a href="https://www.rndsystems.com/products/human-mouse-nlrp3-nalp3-alexa-fluor-405-conjugated-antibody-768319_ic7578v">https://www.rndsystems.com/products/human-mouse-nlrp3-nalp3-alexa-fluor-405-conjugated-antibody-768319_ic7578v</a>                                                                                                                                                               |
| S100A8/A9 Antibody                                            | Novus Biologicals | NBP2-47667AF594 | 1:100 | <a href="https://www.novusbio.com/products/s100a8-a9-antibody-mac387_nbp2-47667af594">https://www.novusbio.com/products/s100a8-a9-antibody-mac387_nbp2-47667af594</a>                                                                                                                                                                                                                                     |
| Anti-IgG2b κ, Mouse, BV421, Clone: 27-35, Isotype Control, BD | Fisher Scientific | BDB562748       | 1:100 | <a href="https://www.fishersci.com/shop/products/anti-igg2b-mouse-clone-27-35-isotype-control-bd-1/BDB562748">https://www.fishersci.com/shop/products/anti-igg2b-mouse-clone-27-35-isotype-control-bd-1/BDB562748</a>                                                                                                                                                                                     |
| APC Mouse IgG1 κ Isotype Control                              | Fisher Scientific | BDB554681       | 1:100 | <a href="https://www.fishersci.com/shop/products/anti-igg1-mouse-apc-clone-mopc-21-isotype-control-bd-3/BDB554681?searchHijack=true&amp;searchTerm=554681&amp;searchType=RAPID&amp;matchedCatNo=554681">https://www.fishersci.com/shop/products/anti-igg1-mouse-apc-clone-mopc-21-isotype-control-bd-3/BDB554681?searchHijack=true&amp;searchTerm=554681&amp;searchType=RAPID&amp;matchedCatNo=554681</a> |

|                                        |                    |            |        |                                                                                                                                                                                                                                                                                                                                                                           |
|----------------------------------------|--------------------|------------|--------|---------------------------------------------------------------------------------------------------------------------------------------------------------------------------------------------------------------------------------------------------------------------------------------------------------------------------------------------------------------------------|
| PE-CF594 Mouse IgG1, κ Isotype Control | Fisher Scientific  | BDB562292  | 1:100  | <a href="https://www.fishersci.com/shop/products/anti-klh-pe-cf594-clone-x40-bd/BDB562292?searchHijack=true&amp;searchTerm=BD B562292&amp;searchType=RAPID&amp;matchedCatNo=BD B562292">https://www.fishersci.com/shop/products/anti-klh-pe-cf594-clone-x40-bd/BDB562292?searchHijack=true&amp;searchTerm=BD B562292&amp;searchType=RAPID&amp;matchedCatNo=BD B562292</a> |
| pSMAD3                                 | Abcam              | ab52903    | 1:1000 | <a href="https://www.abcam.com/smad3-phospho-s423--s425-antibody-ep823y-ab52903.html">https://www.abcam.com/smad3-phospho-s423--s425-antibody-ep823y-ab52903.html</a>                                                                                                                                                                                                     |
| Total SMAD3                            | Abcam              | ab40854    | 1:1000 | <a href="https://www.abcam.com/smad3-antibody-ep568y-ab40854.html">https://www.abcam.com/smad3-antibody-ep568y-ab40854.html</a>                                                                                                                                                                                                                                           |
| α-SMA                                  | Sigma-Aldrich      | A5228      | 1:400  | <a href="https://www.sigmaaldrich.com/US/en/product/sigma/a5228">https://www.sigmaaldrich.com/US/en/product/sigma/a5228</a>                                                                                                                                                                                                                                               |
| α-Actinin                              | Sigma-Aldrich      | SAB4503474 | 1:200  | <a href="https://www.sigmaaldrich.com/US/en/product/sigma/sab4503474">https://www.sigmaaldrich.com/US/en/product/sigma/sab4503474</a>                                                                                                                                                                                                                                     |
| Donkey anti-Rabbit, Alexa Fluor 488    | Invitrogen         | A-21206    | 1:400  | <a href="https://www.thermofisher.com/antibody/product/Donkey-anti-Rabbit-IgG-H-L-Highly-Cross-Adsorbed-Secondary-Antibody-Polyclonal/A-21206">https://www.thermofisher.com/antibody/product/Donkey-anti-Rabbit-IgG-H-L-Highly-Cross-Adsorbed-Secondary-Antibody-Polyclonal/A-21206</a>                                                                                   |
| Goat anti-Mouse, Alexa Fluor 647       | Invitrogen         | A-21236    | 1:400  | <a href="https://www.thermofisher.com/antibody/product/Goat-anti-Mouse-IgG-H-L-Highly-Cross-Adsorbed-Secondary-Antibody-Polyclonal/A-21236">https://www.thermofisher.com/antibody/product/Goat-anti-Mouse-IgG-H-L-Highly-Cross-Adsorbed-Secondary-Antibody-Polyclonal/A-21236</a>                                                                                         |
| IRDye 680LT Goat anti-Rabbit IgG       | LI-COR Biosciences | 926-68021  | 1:3000 | <a href="https://www.licor.com/bio/reagents/irdye-680lt-goat-anti-rabbit-igg-secondary-antibody">https://www.licor.com/bio/reagents/irdye-680lt-goat-anti-rabbit-igg-secondary-antibody</a>                                                                                                                                                                               |
| IRDye® 800CW Goat anti-Mouse IgG       | LI-COR Biosciences | 925-32210  | 1:3000 | <a href="https://www.licor.com/bio/reagents/irdye-800cw-goat-anti-mouse-igg-secondary-antibody">https://www.licor.com/bio/reagents/irdye-800cw-goat-anti-mouse-igg-secondary-antibody</a>                                                                                                                                                                                 |

### Cultured Cells

| Name                                 | Vendor or Source     | Sex (F, M, or unknown) | Persistent ID / URL                                                                       |
|--------------------------------------|----------------------|------------------------|-------------------------------------------------------------------------------------------|
| K562 Cells                           | ATCC #CCL-243        | Unknown                | <a href="https://www.atcc.org/products/ccl-243">https://www.atcc.org/products/ccl-243</a> |
| Neonatal rat ventricular myocytes    | 2–3-day old rat pups | M, F                   |                                                                                           |
| Neonatal rat ventricular fibroblasts | 2-3 day old rat pups | M, F                   |                                                                                           |

DOI [to be added]

|             |                                        |         |                                                                                                                                                                         |
|-------------|----------------------------------------|---------|-------------------------------------------------------------------------------------------------------------------------------------------------------------------------|
| Human PBMCs | iXCells Biotechnologies #10HU-003-CR5M | Unknown | <a href="https://www.ixcellsbiotech.com/human-primary-cells/human-pbmcs-cryopreserved">https://www.ixcellsbiotech.com/human-primary-cells/human-pbmcs-cryopreserved</a> |
|-------------|----------------------------------------|---------|-------------------------------------------------------------------------------------------------------------------------------------------------------------------------|

### Data & Code Availability

| Description | Source / Repository | Persistent ID / URL |
|-------------|---------------------|---------------------|
|             |                     |                     |

### Other

| Primers used for qPCR                  | Vendor             | Assay ID      | Catalog # |
|----------------------------------------|--------------------|---------------|-----------|
| COL1A1                                 | Applied Biosystems | Mm00801666_g1 | 4331182   |
| COL3A1                                 | Applied Biosystems | Mm00802296_g1 | 4331182   |
| ANP                                    | Applied Biosystems | Mm01255747_g1 | 4331182   |
| BNP                                    | Applied Biosystems | Mm01255770_g1 | 4331182   |
| Eukaryotic 18S rRNA Endogenous Control | Applied Biosystems | -             | 4319413E  |

### Other

| Description                  | Vendor        | Catalog # |
|------------------------------|---------------|-----------|
| Hematoxylin-Eosin            | Sigma-Aldrich | HT1079    |
| Trichrome Stain (Masson) Kit | Sigma-Aldrich | HT15      |
| RNeasy Mini Kit              | Qiagen        | 74104     |

DOI [to be added]

|                                                   |                           |              |
|---------------------------------------------------|---------------------------|--------------|
| iScript cDNA synthesis kit                        | Bio-rad                   | 170-8891     |
| TaqMan Gene Expression Master Mix                 | Applied Biosystems        | 4369016      |
| ProLong Gold antifade reagent with DAPI           | Invitrogen                | P36941       |
| Antigen Unmasking Solution                        | Vector Lab Inc            | H-3300       |
| cell lysis buffer                                 | Cell signaling Technology | 9803S        |
| Protease Inhibitor Cocktail                       | Sigma-Aldrich             | P8340        |
| Phosphatase Inhibitor Cocktail                    | Sigma-Aldrich             | P0044        |
| NE-PER Reagent                                    | Pierce                    | 78833        |
| Bio-Rad Protein Assay Dye                         | Bio-rad                   | 5000006      |
| Odyssey blocking buffer                           | LI-COR Biosciences        | 927-40000    |
| Immobilon-P PVDF membrane                         | EMD Millipore             | IPVH00010    |
| TGFβ1                                             | Sigma-Aldrich             | T7039        |
| recombinant mouse IL-11                           | R&D Systems               | 418-ML-005   |
| PureCol® 3 mg/ml, Type I collagen stock solution  | Advanced Biomatrix        | 5005         |
| BrdU labeling and detection kit                   | Roche                     | 11296736001  |
| BrdU                                              | Sigma-Aldrich             | B5002        |
| Weigert's iron hematoxylin solution,Set           | Sigma-Aldrich             | HT1079-1SET  |
| Deoxyribonuclease I bovine                        | Sigma-Aldrich             | D5319        |
| Hyaluronidase from bovine testes                  | Sigma-Aldrich             | H3506        |
| Collagenase from Clostridium histolyticum,Type-XI | Sigma-Aldrich             | C7657        |
| Collagenase from Clostridium histolyticum,Type I  | Sigma-Aldrich             | C0130        |
| In Situ Cell Death Detection Kit, TMR red         | Sigma-Aldrich             | 12156792910  |
| Mouse Calprotectin ELISA Kit (S100A8/S100A9)      | Abcam                     | ab263885     |
| Curved Feeding Needle, 22 Gauge                   | Kent-Scientific           | FNC-22-1.5-2 |

|                                                                        |                          |            |
|------------------------------------------------------------------------|--------------------------|------------|
| Bd apc BrdU Flow Kit                                                   | Fisher Scientific        | BDB552598  |
| PEG400                                                                 | MedChem Express          | HY-Y0873A  |
| Tween 80                                                               | MedChem Express          | HY-Y1891   |
| MitoSOX™ Red Mitochondrial Superoxide Indicator, for live-cell imaging | Thermo Fisher Scientific | M36008     |
| Ponatinib                                                              | LC Laboratories          | P-7022     |
| Dimethyl sulfoxide                                                     | MedChem Express          | HY-Y0320   |
| Ebioscience™ Cell Stimulation Cocktail (500X)                          | Thermo Scientific        | 00-4970-03 |
| Protein Transport Inhibitor (Containing Monensin), BD GolgiStop™       | Fisher Scientific        | BDB554724  |
| Ebioscience™ Foxp3 / Transcription Factor Staining Buffer Set          | Thermo Scientific        | 00-5523-00 |
| IL-1 beta Mouse Uncoated ELISA Kit                                     | Thermo Scientific        | 88-7013-88 |
| Bd cytofix/cytoperm Fixation/Permeabilization Solution Kit             | Fisher Scientific        | BDB554714  |
| Gibco ack Lysing Buffer                                                | Fisher Scientific        | A1049201   |
| Rpmi 1640 Medium                                                       | Thermo Scientific        | 11875093   |
| BD™ Tuberculin Syringes, BD Medical, Syringe Only, Volume=1 mL         | Fisher Scientific        | 14-823-434 |
| Bouin's Solution                                                       | Fisher Scientific        | 50-320-05  |
