# Supplementary material
Source: PubMed Central journal article supplement (PMC9898181)

Figure S7 A

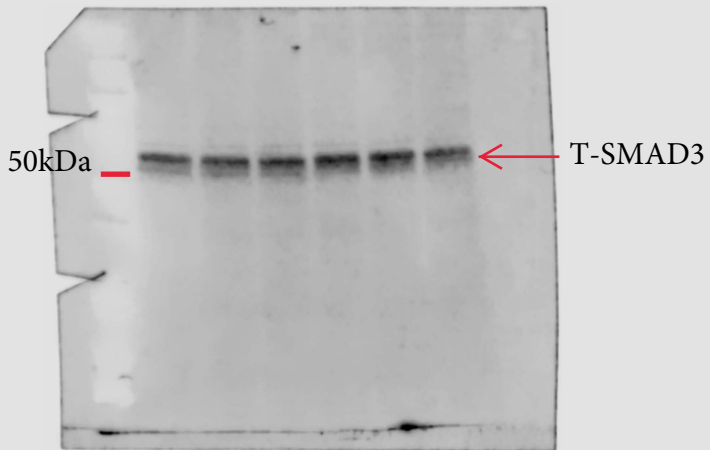

50kDa

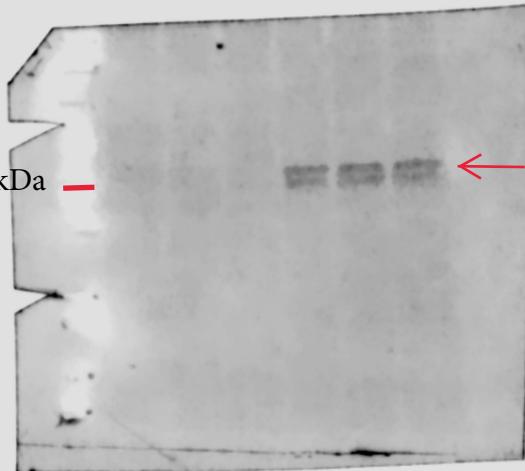

pSMAD3

Supplement: NIHMS1861661-supplement-321504_Uncut_Gel_Blots.pdf [file NIHMS1861661-supplement-321504_Uncut_Gel_Blots.pdf]
